# Supplementary material for: Phosphorane intermediate vs. leaving group stabilization by intramolecular hydrogen bonding in the cleavage of trinucleoside monophosphates: implications for understanding catalysis by the large ribozymes
Source: Royal Society of Chemistry journal article supplement (doi:10.1039/b912042d), 2009-11-19

**Phosphorane intermediate vs. leaving group stabilization by intramolecular hydrogen bonding in the cleavage of trinucleoside monophosphates: implications to catalysis by the large ribozymes**

Tuomas Lönnberg and Maarit Laine

**Supplementary information**

**Contents**

|                                                                                                         |    |
|---------------------------------------------------------------------------------------------------------|----|
| <sup>1</sup> H NMR spectrum of <b>10</b>                                                                | 2  |
| <sup>13</sup> C NMR spectrum of <b>10</b>                                                               | 6  |
| <sup>1</sup> H NMR spectrum of <b>11</b>                                                                | 7  |
| <sup>13</sup> C NMR spectrum of <b>11</b>                                                               | 11 |
| HPLC chromatogram of <b>11</b>                                                                          | 12 |
| UV spectrum of <b>11</b>                                                                                | 13 |
| <sup>1</sup> H NMR spectrum of <b>7</b>                                                                 | 14 |
| <sup>13</sup> C NMR spectrum of <b>7</b>                                                                | 18 |
| HPLC chromatogram of <b>7</b>                                                                           | 19 |
| UV spectrum of <b>7</b>                                                                                 | 20 |
| <sup>1</sup> H NMR spectrum of <b>5b</b>                                                                | 21 |
| <sup>31</sup> P NMR spectrum of <b>5b</b>                                                               | 26 |
| <sup>1</sup> H NMR spectrum of <b>4b</b>                                                                | 27 |
| <sup>31</sup> P NMR spectrum of <b>4b</b>                                                               | 31 |
| HPLC chromatogram of <b>4b</b>                                                                          | 32 |
| UV spectrum of <b>4b</b>                                                                                | 33 |
| Observed pseudo first-order rate constants and product distributions for the hydrolysis of <b>1a, b</b> | 34 |
| Sample chromatogram of the RP HPLC analysis of the reaction mixtures                                    | 35 |

SpinWorks 3: 5'-O-Methyl-2'-azido-2'-deoxyuridine

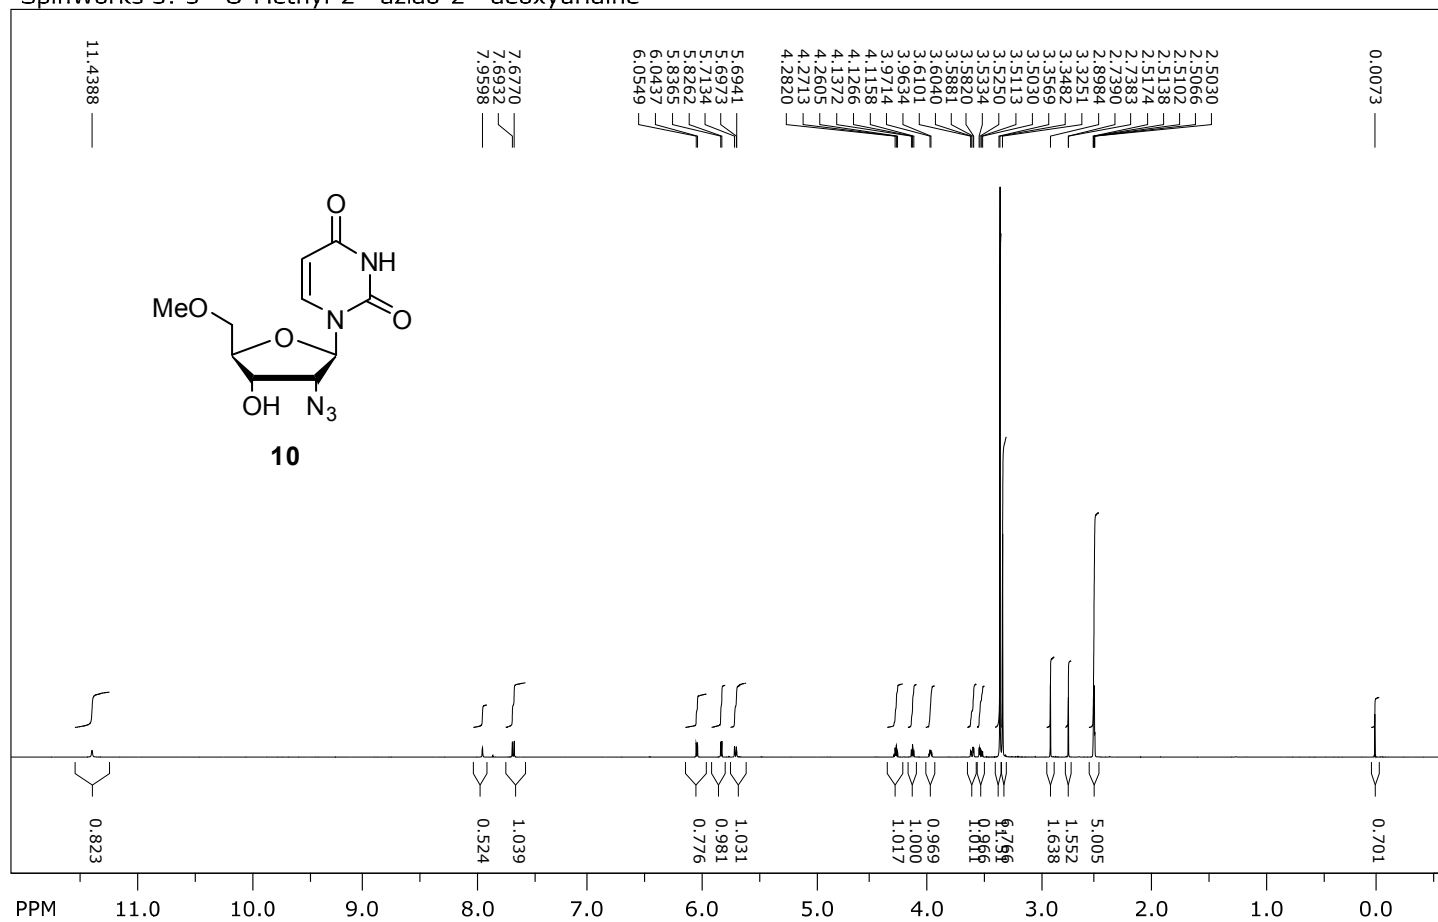

file: E:\Maaritin spektrit\atsido\1\fid expt: <zg30>  
 transmitter freq.: 500.133089 MHz  
 time domain size: 65536 points  
 width: 10330.58 Hz = 20.6557 ppm = 0.157632 Hz/pt  
 number of scans: 16

freq. of 0 ppm: 500.130000 MHz  
 processed size: 32768 complex points  
 LB: 0.000 GF: 0.0000  
 Hz/cm: 255.657 ppm/cm: 0.51118

SpinWorks 3: 5'-O-Methyl-2'-azido-2'-deoxyuridine

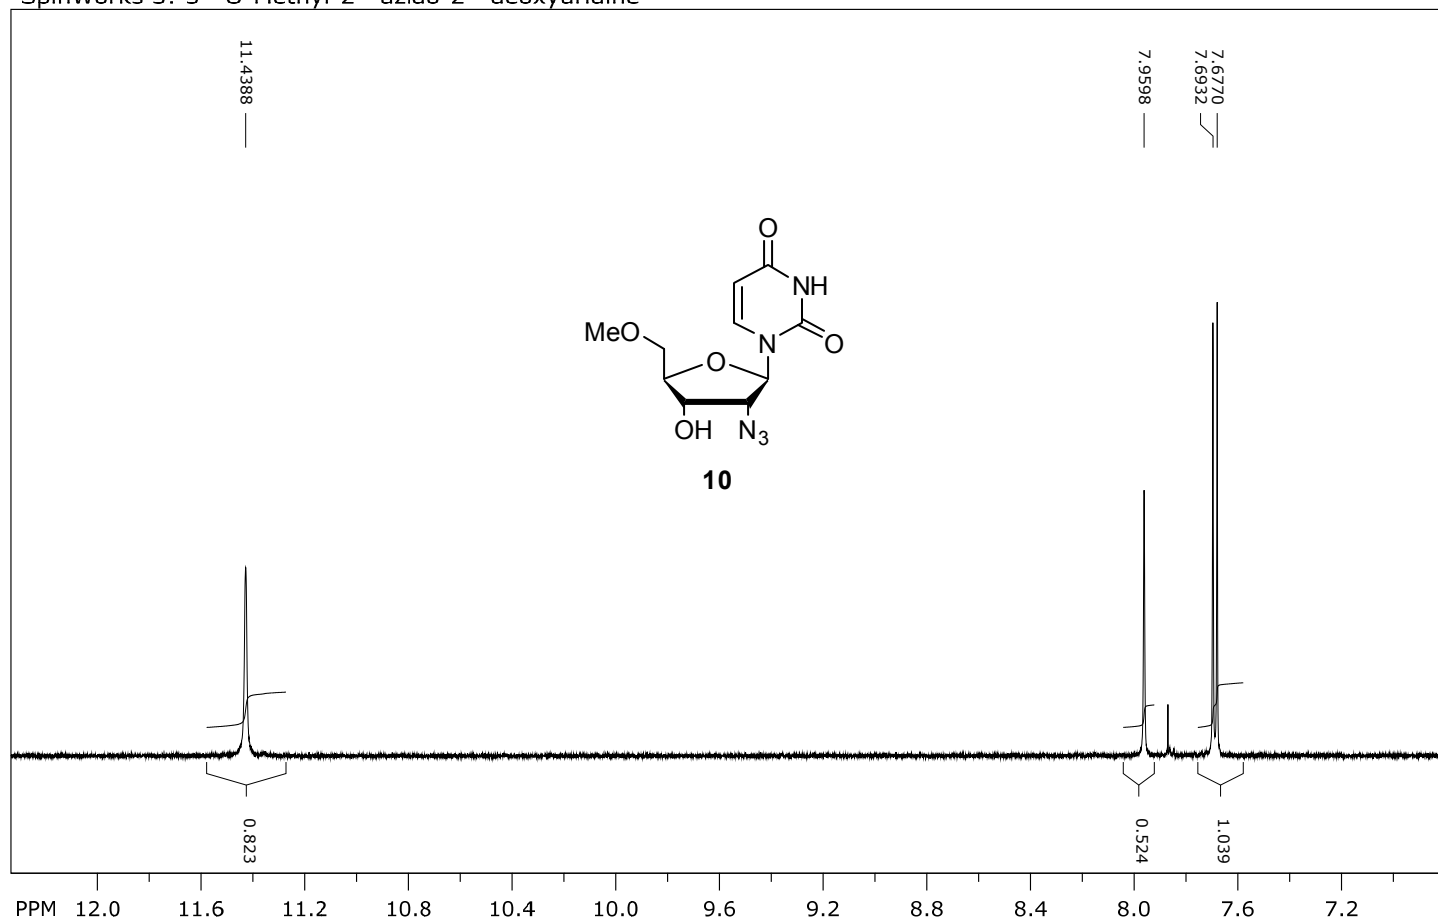

file: E:\Maaritin spektrit\atsido\1\fid expt: <zg30>  
transmitter freq.: 500.133089 MHz  
time domain size: 65536 points  
width: 10330.58 Hz = 20.6557 ppm = 0.157632 Hz/pt  
number of scans: 16

freq. of 0 ppm: 500.130000 MHz  
processed size: 32768 complex points  
LB: 0.000 GF: 0.0000  
Hz/cm: 111.091 ppm/cm: 0.22212

SpinWorks 3: 5'-O-Methyl-2'-azido-2'-deoxyuridine

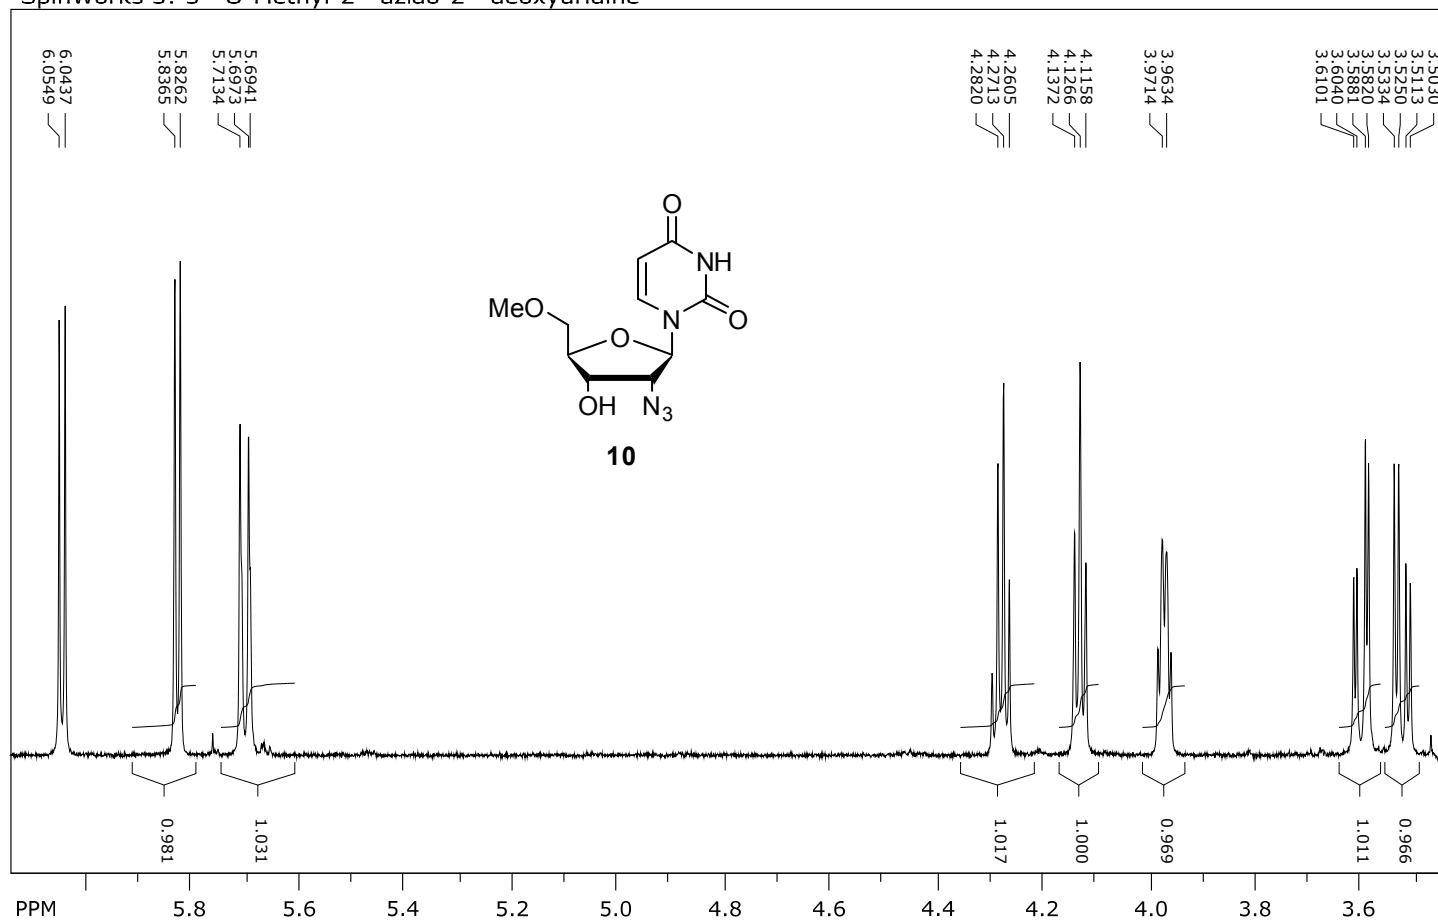

file: E:\Maaritin spektrit\atsido\1\fid expt: <zg30>  
transmitter freq.: 500.133089 MHz  
time domain size: 65536 points  
width: 10330.58 Hz = 20.6557 ppm = 0.157632 Hz/pt  
number of scans: 16

freq. of 0 ppm: 500.130000 MHz  
processed size: 32768 complex points  
LB: 0.000 GF: 0.0000  
Hz/cm: 54.185 ppm/cm: 0.10834

SpinWorks 3: 5'-O-Methyl-2'-azido-2'-deoxyuridine

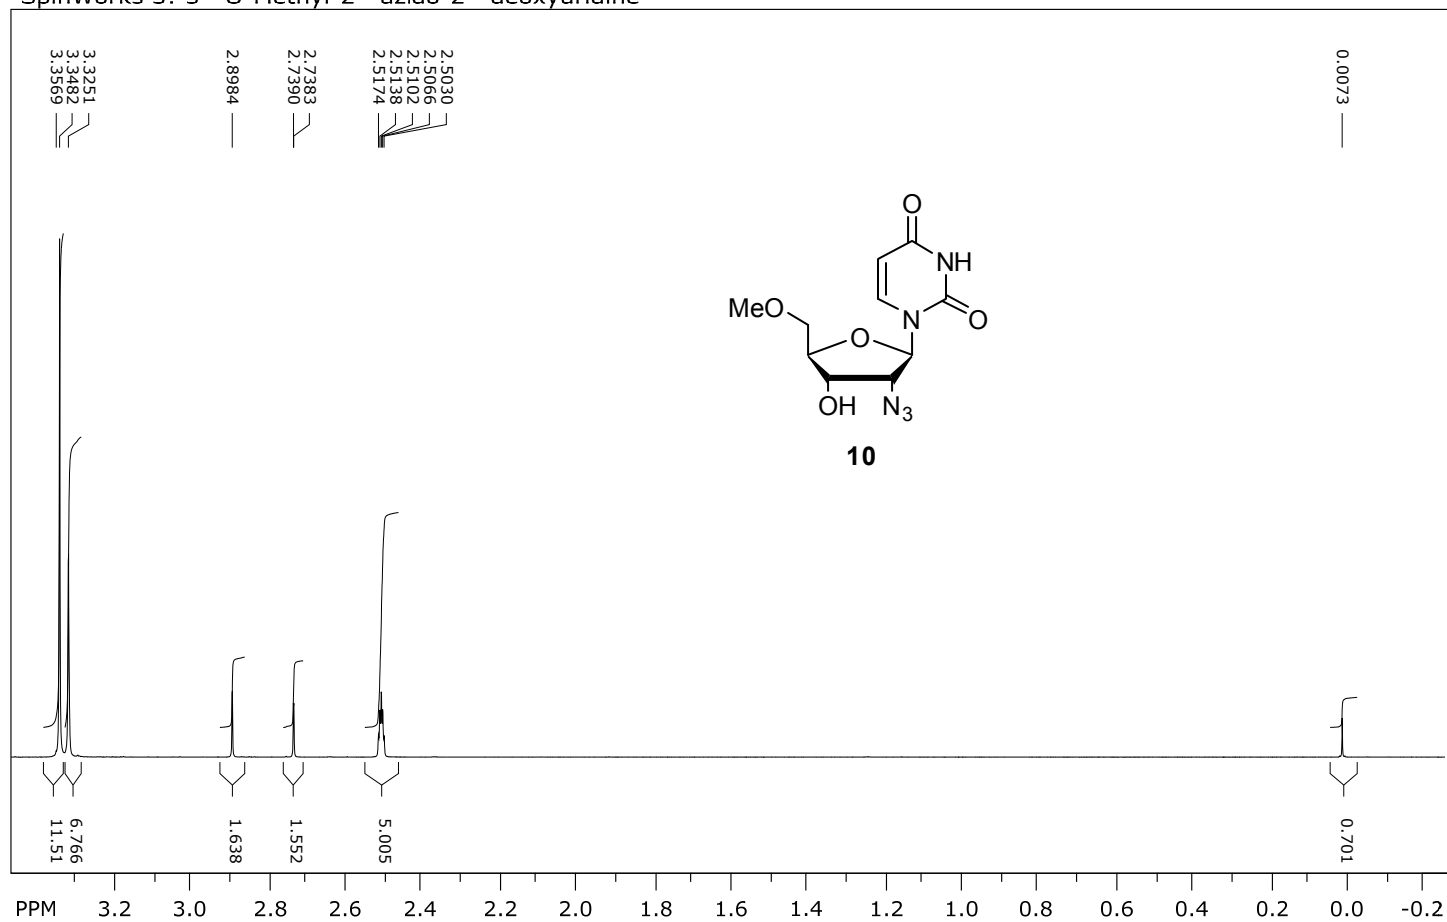

file: E:\Maaritin spektrit\atsido\1\fid exp: <zg30>  
transmitter freq.: 500.133089 MHz  
time domain size: 65536 points  
width: 10330.58 Hz = 20.6557 ppm = 0.157632 Hz/pt  
number of scans: 16

freq. of 0 ppm: 500.130000 MHz  
processed size: 32768 complex points  
LB: 0.000 GF: 0.0000  
Hz/cm: 74.735 ppm/cm: 0.14943

SpinWorks 3: 5'-O-Methyl-2'-azido-2'-deoxyuridine

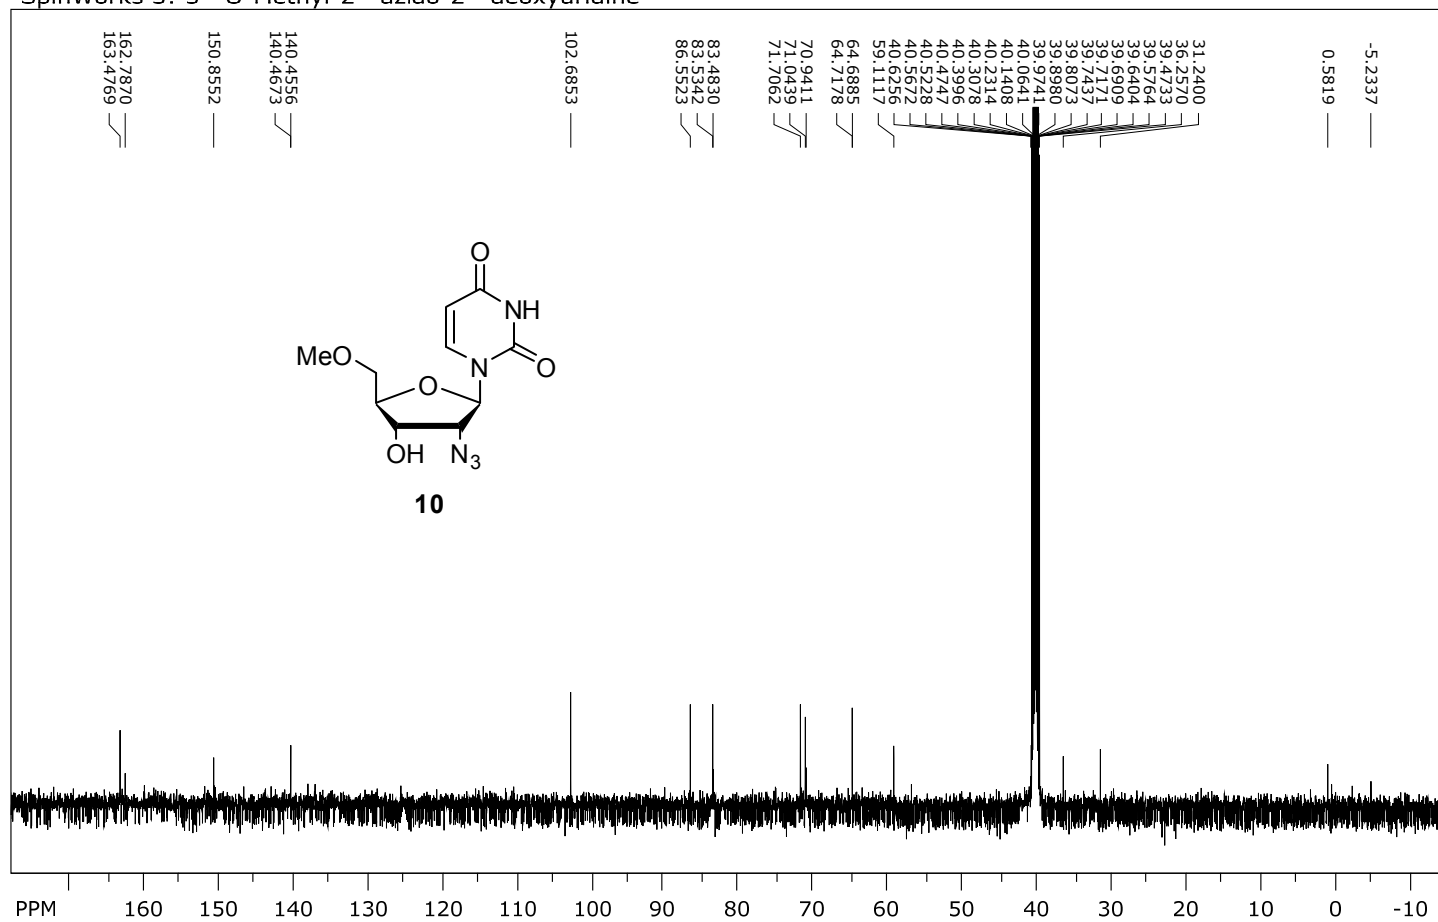

file: E:\Maaritin spektrit\atsido\13\fid expt: <zpgg30>  
transmitter freq.: 125.770364 MHz  
time domain size: 65536 points  
width: 30030.03 Hz = 238.7687 ppm = 0.458222 Hz/pt  
number of scans: 1115

freq. of 0 ppm: 125.757789 MHz  
processed size: 32768 complex points  
LB: 0.000 GF: 0.0000  
Hz/cm: 973.091 ppm/cm: 7.73704

SpinWorks 3: 5'-O-Methyl-2'-amino-2'-deoxyuridine

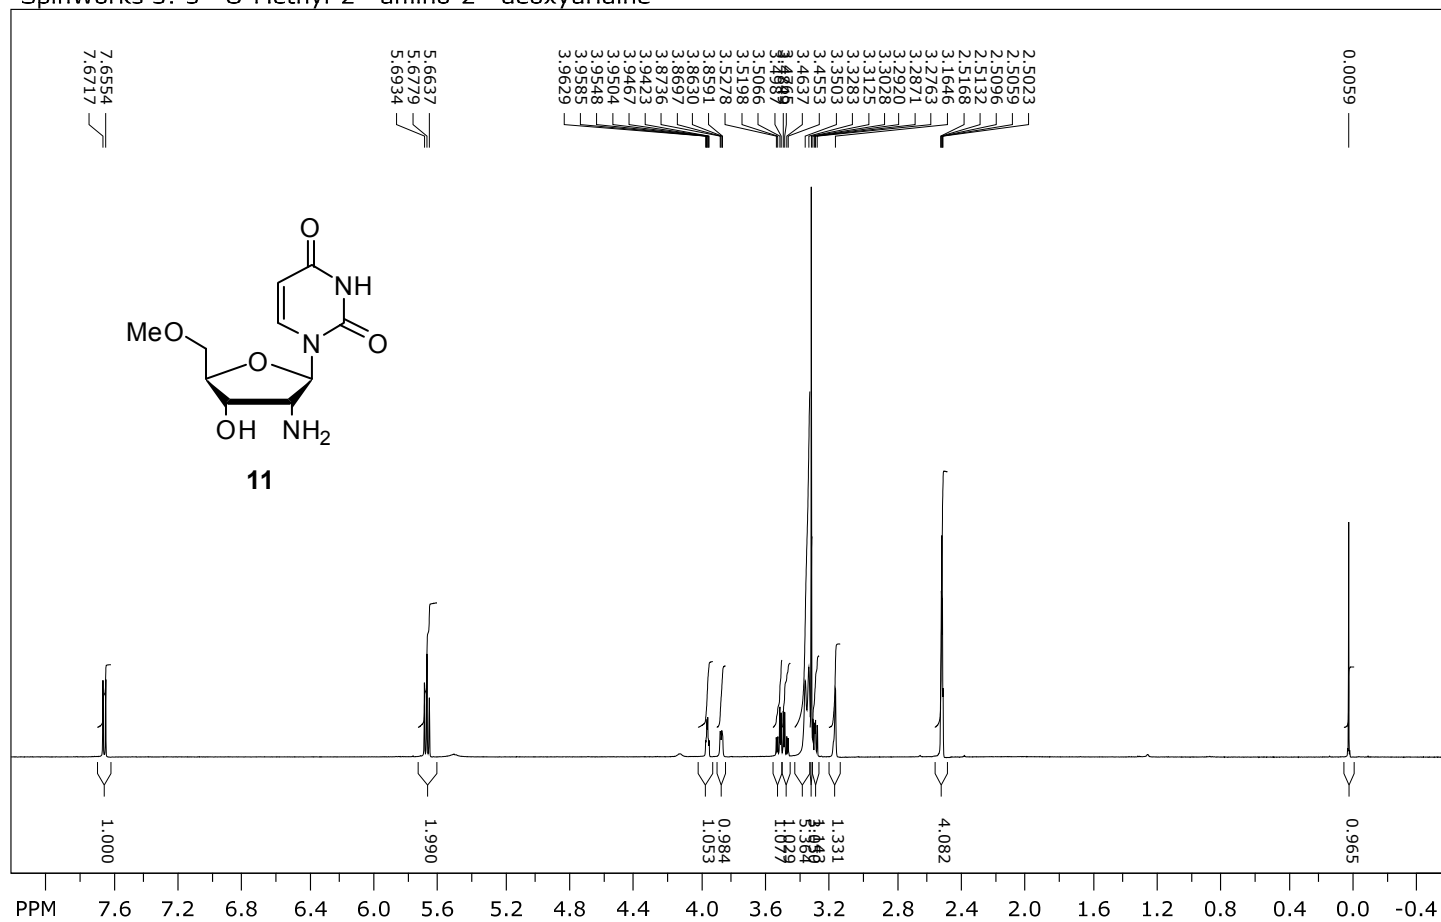

file: E:\Maaritin spektrit\amino\1\fid expt: <zg30>  
 transmitter freq.: 500.133089 MHz  
 time domain size: 65536 points  
 width: 10330.58 Hz = 20.6557 ppm = 0.157632 Hz/pt  
 number of scans: 16

freq. of 0 ppm: 500.130000 MHz  
 processed size: 32768 complex points  
 LB: 0.000 GF: 0.0000  
 Hz/cm: 176.562 ppm/cm: 0.35303

SpinWorks 3: 5'-O-Methyl-2'-amino-2'-deoxyuridine

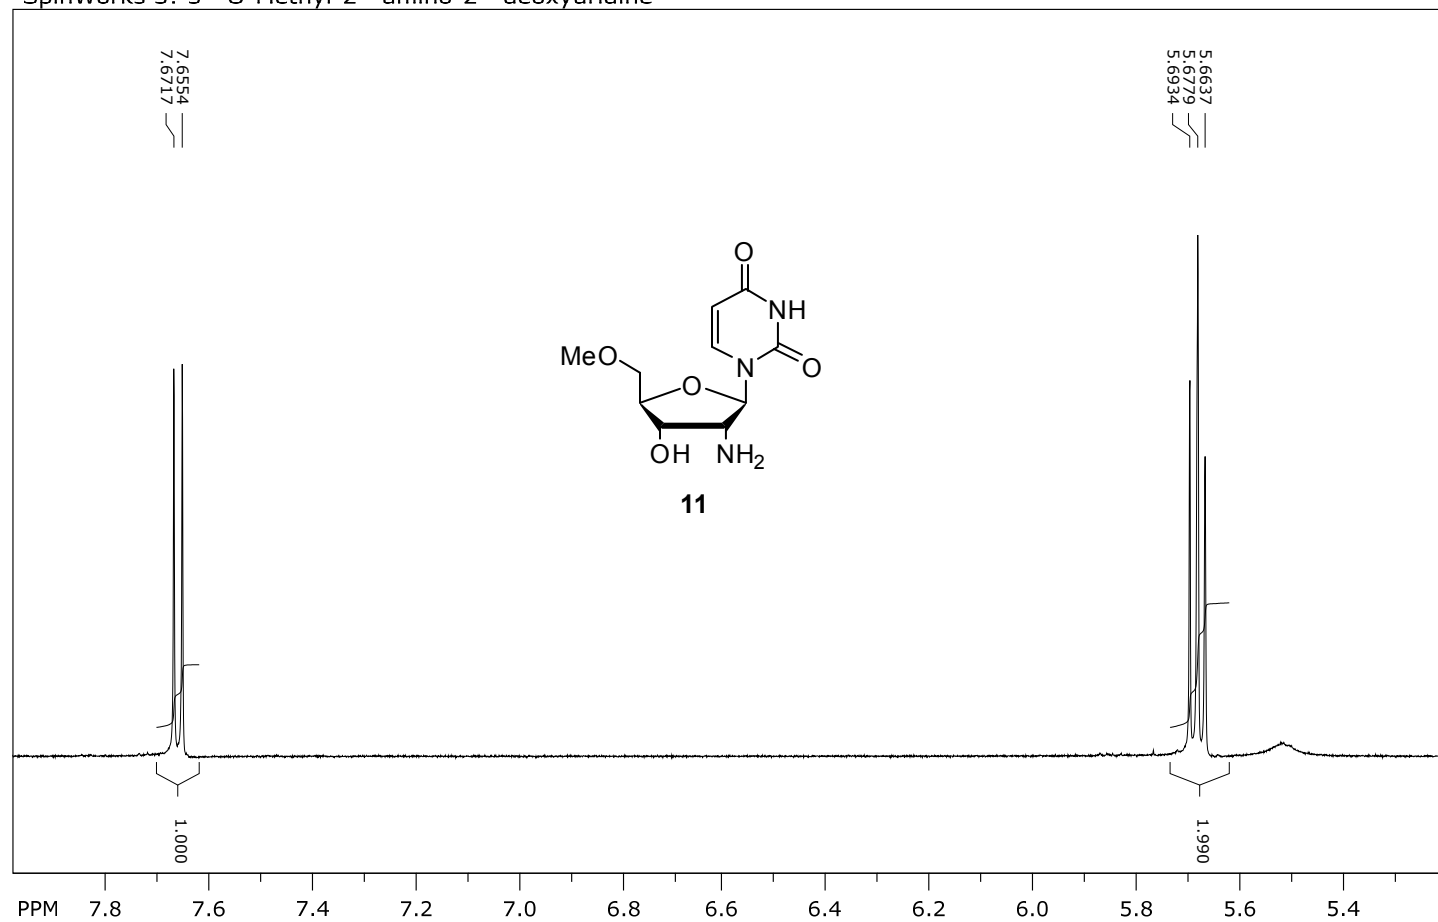

file: E:\Maaritin spektrit\amino\1\fid expt: <zg30>  
transmitter freq.: 500.133089 MHz  
time domain size: 65536 points  
width: 10330.58 Hz = 20.6557 ppm = 0.157632 Hz/pt  
number of scans: 16

freq. of 0 ppm: 500.130000 MHz  
processed size: 32768 complex points  
LB: 0.000 GF: 0.0000  
Hz/cm: 55.865 ppm/cm: 0.11170



SpinWorks 3: 5'-O-Methyl-2'-amino-2'-deoxyuridine

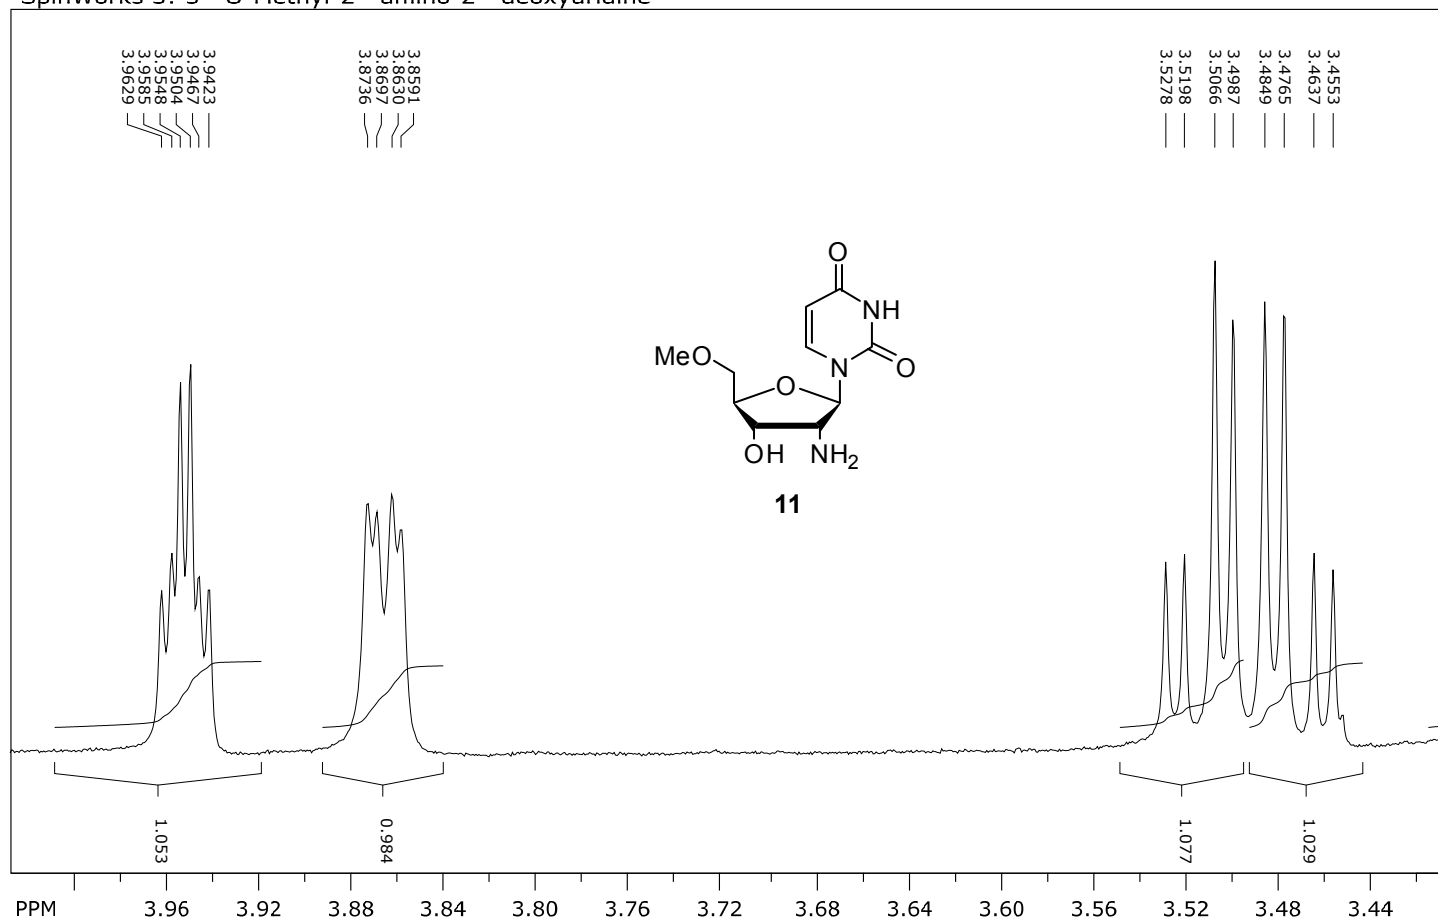

file: E:\Maaritin spektrit\amino\1\fid exp: <zg30>  
transmitter freq.: 500.133089 MHz  
time domain size: 65536 points  
width: 10330.58 Hz = 20.6557 ppm = 0.157632 Hz/pt  
number of scans: 16

freq. of 0 ppm: 500.130000 MHz  
processed size: 32768 complex points  
LB: 0.000 GF: 0.0000  
Hz/cm: 12.429 ppm/cm: 0.02485

SpinWorks 3: 5'-O-Methyl-2'-amino-2'-deoxyuridine

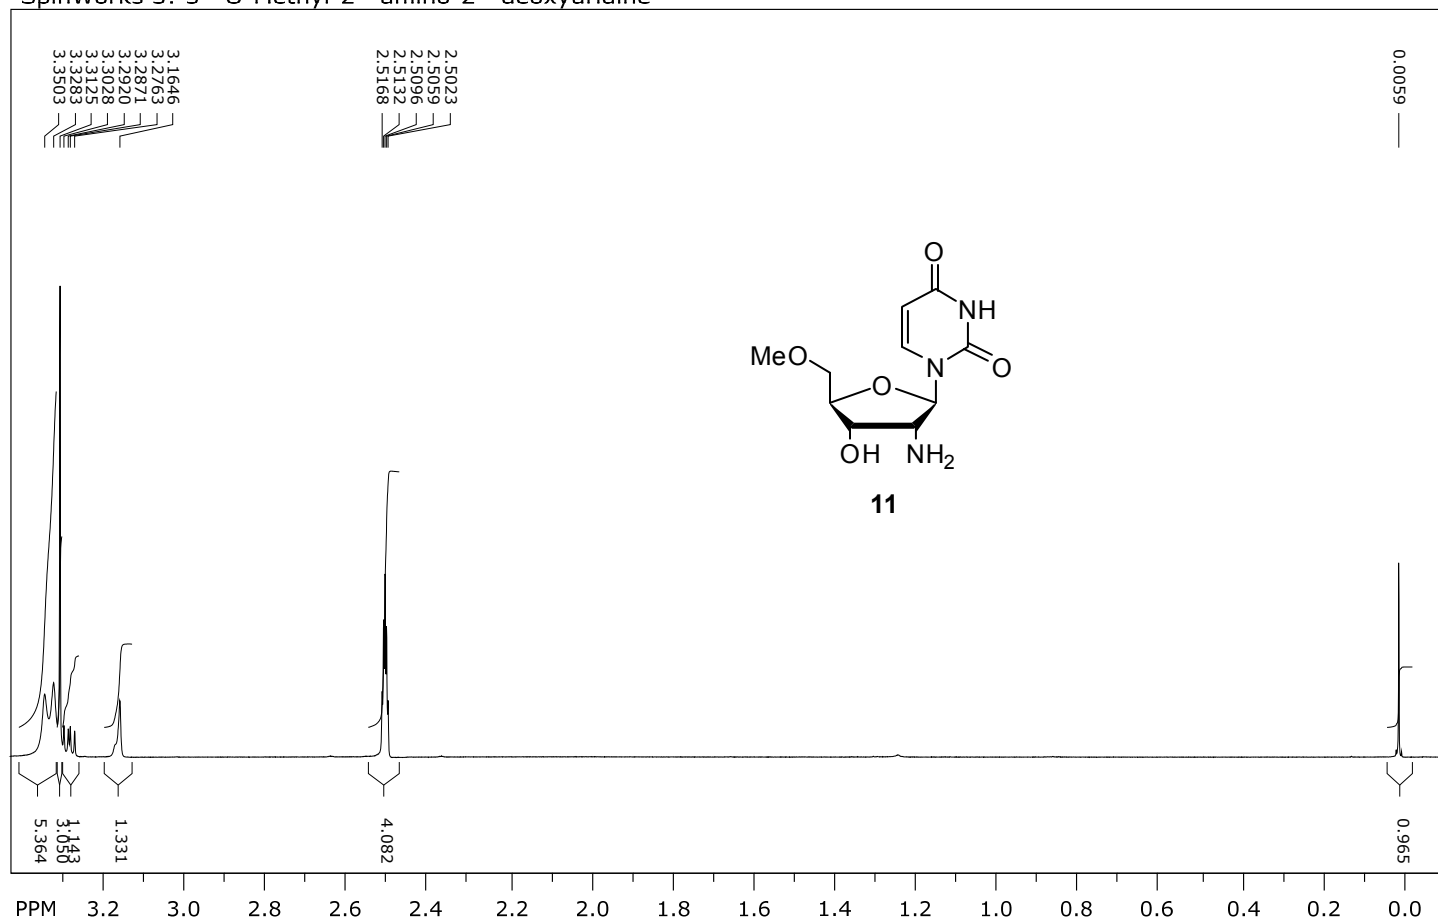

file: E:\Maaritin spektrit\amino\1\fid expt: <zg30>  
transmitter freq.: 500.133089 MHz  
time domain size: 65536 points  
width: 10330.58 Hz = 20.6557 ppm = 0.157632 Hz/pt  
number of scans: 16

freq. of 0 ppm: 500.130000 MHz  
processed size: 32768 complex points  
LB: 0.000 GF: 0.0000  
Hz/cm: 70.863 ppm/cm: 0.14169

SpinWorks 3: 5'-O-Methyl-2'-amino-2'-deoxyuridine

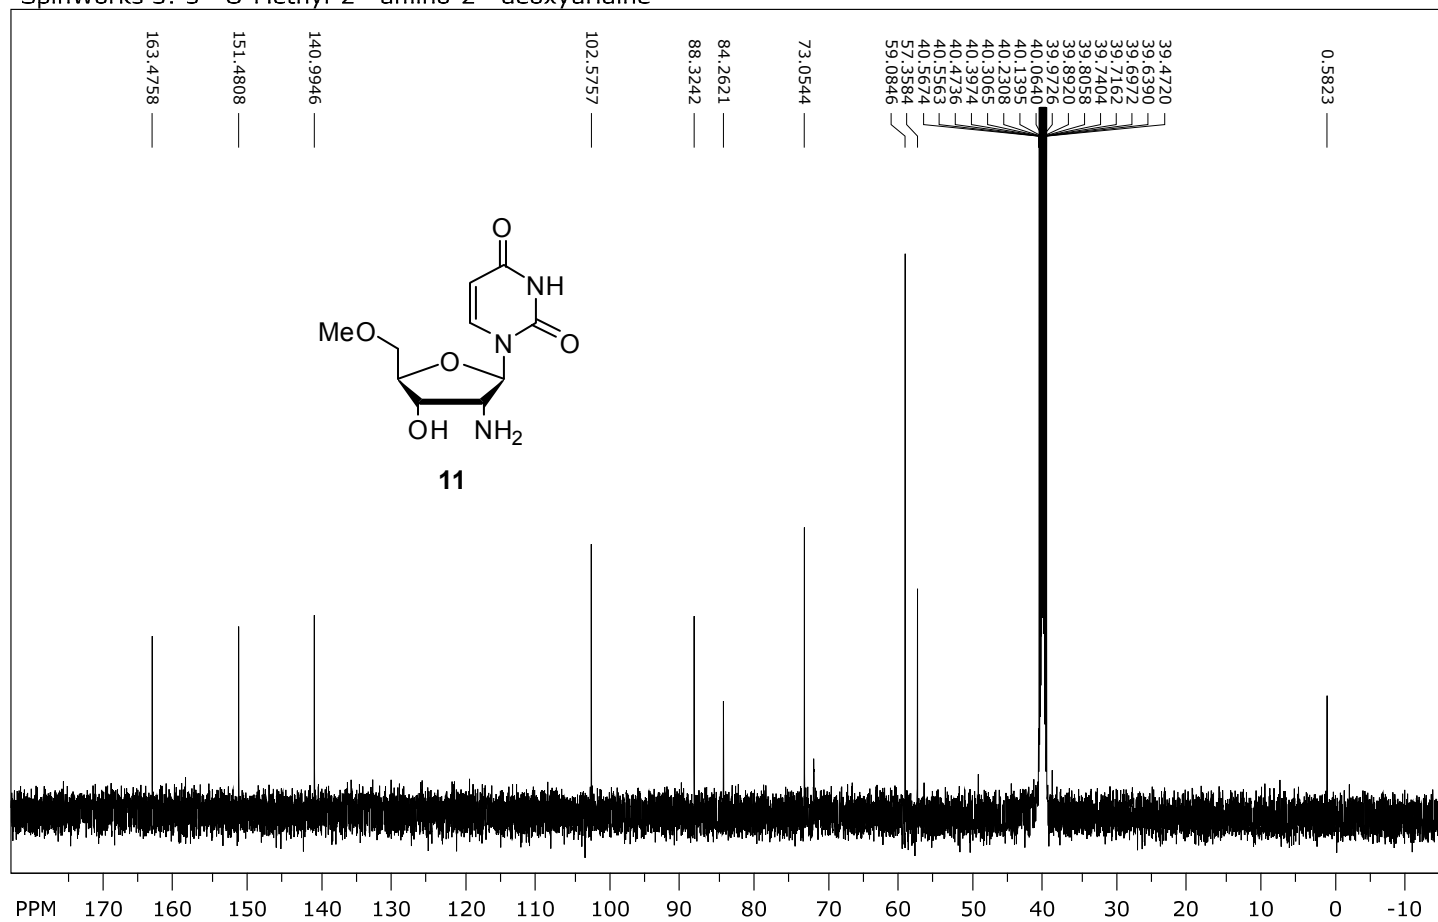

file: E:\Maaritin spektrit\amino1\13\fid expt: <zpgg30>  
transmitter freq.: 125.770364 MHz  
time domain size: 65536 points  
width: 30030.03 Hz = 238.7687 ppm = 0.458222 Hz/pt  
number of scans: 1528

freq. of 0 ppm: 125.757789 MHz  
processed size: 32768 complex points  
LB: 0.000 GF: 0.0000  
Hz/cm: 1000.247 ppm/cm: 7.95296

**Fig. S1** HPLC chromatogram of **11** [Hypersil-Keystone Aquasil C18 column (4 × 150 mm, 5 μm); flow rate = 1 mL min<sup>-1</sup>; 60 mM acetate buffer (pH = 4.3) and a linear gradient of 3→50% MeCN during 60 min, then 50% MeCN for 20 min].

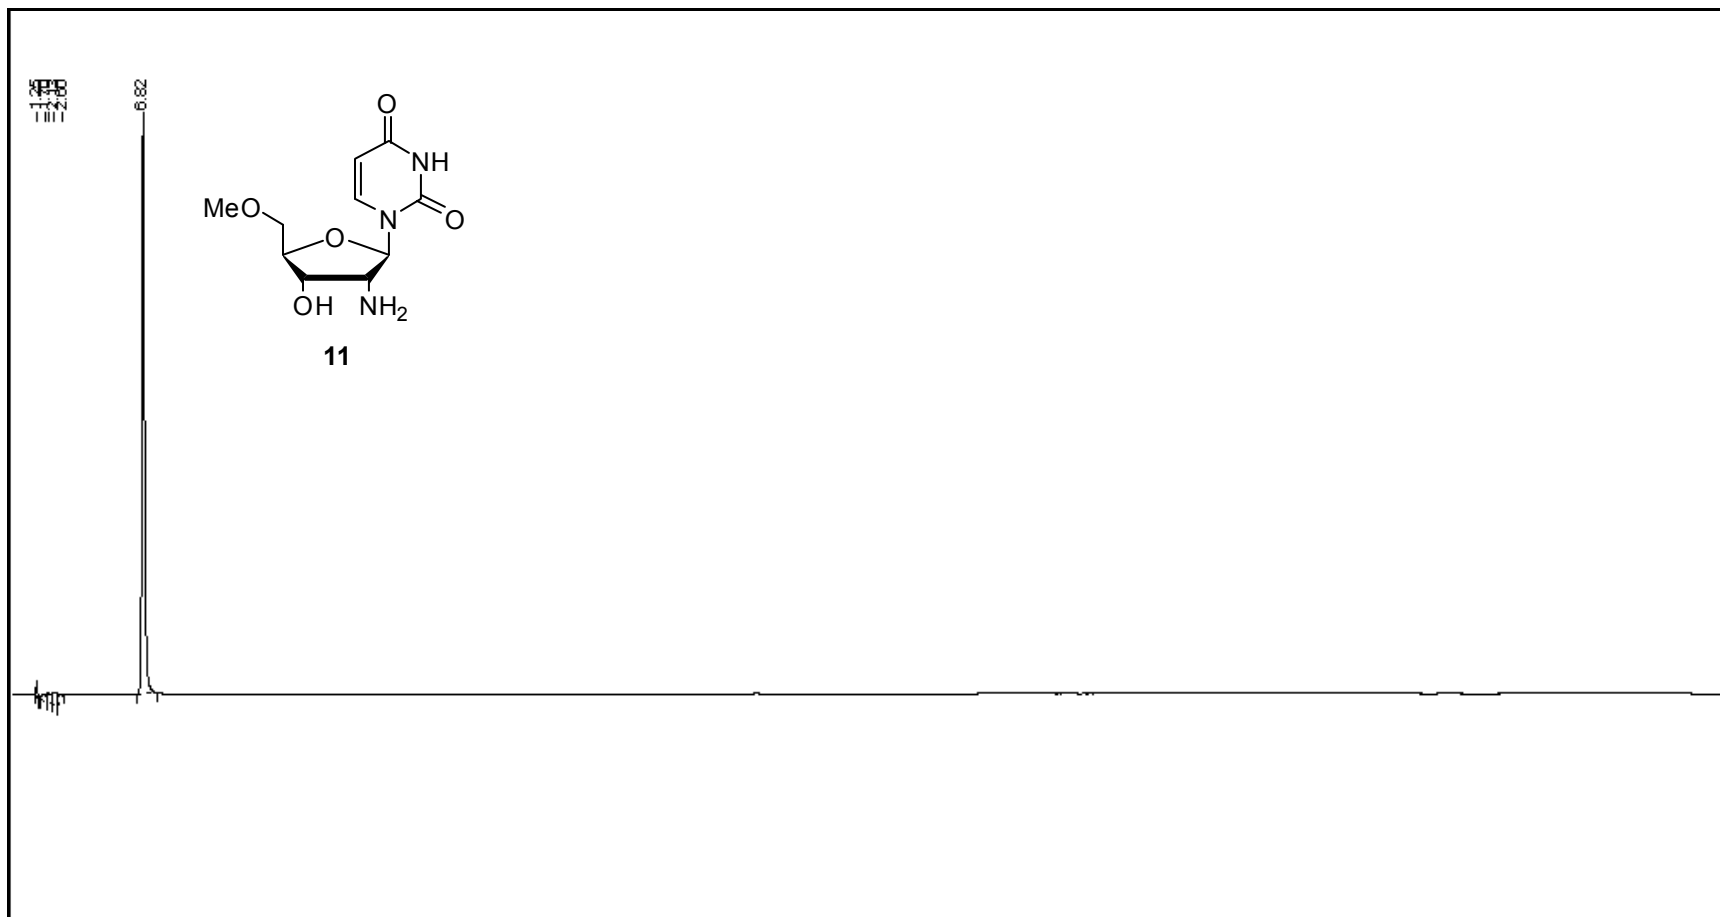

Fig. S2 UV spectrum of **11**.

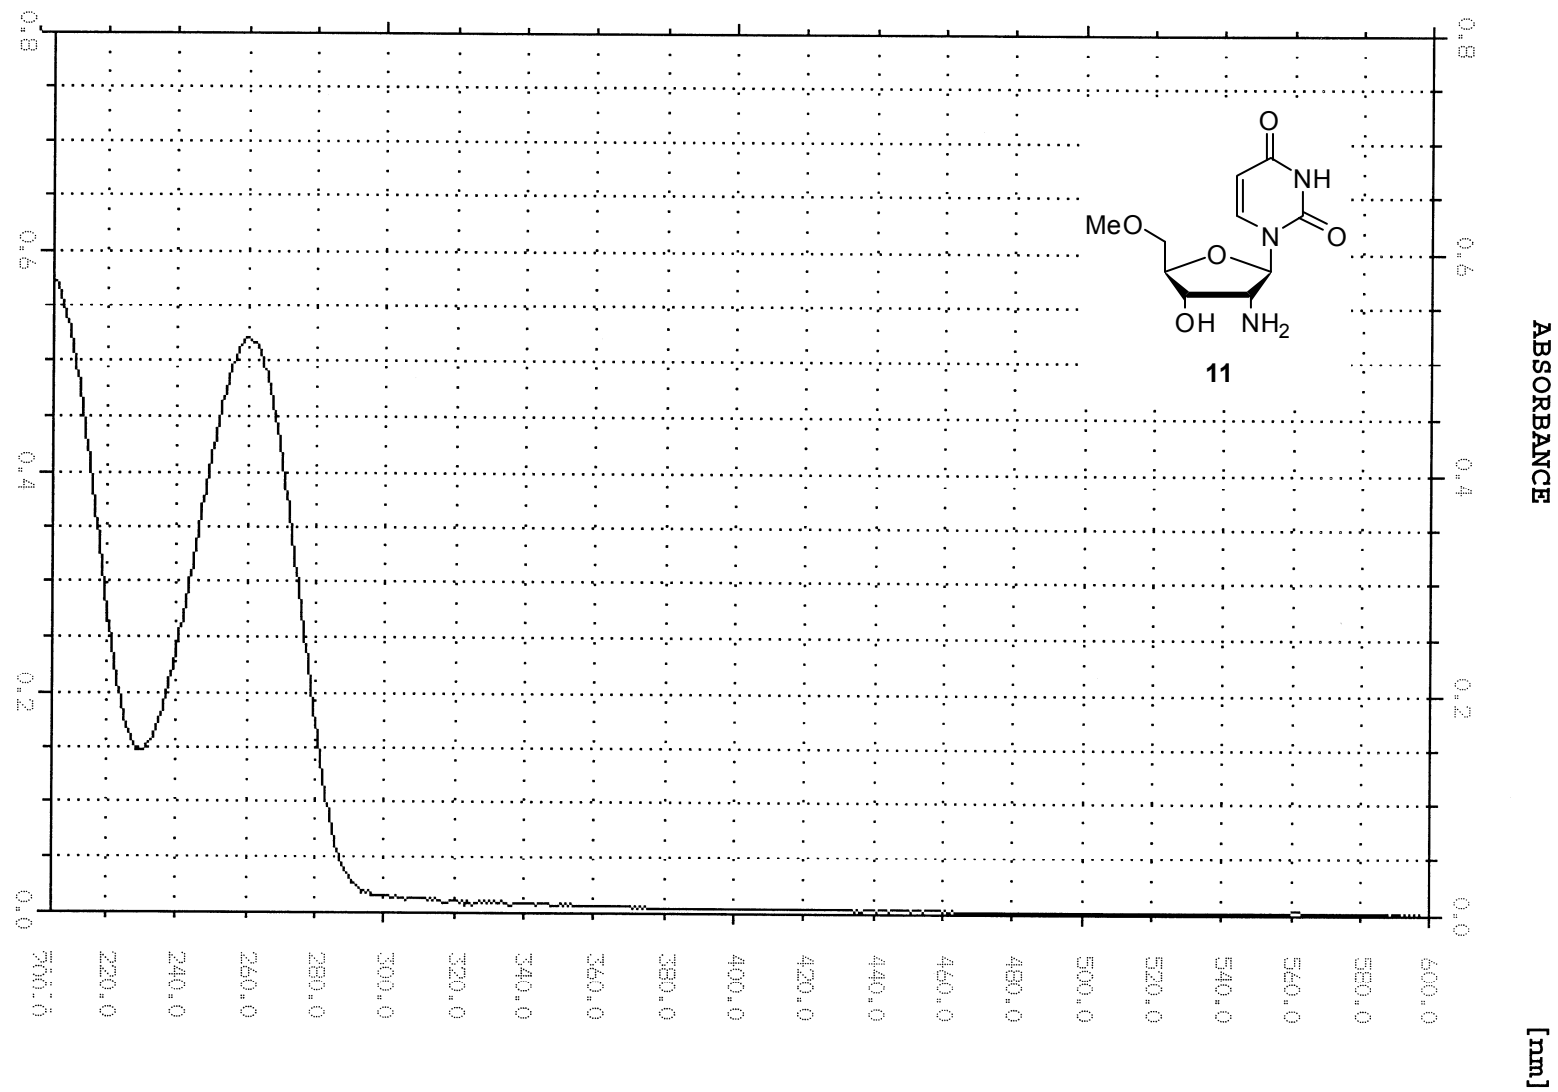

SpinWorks 3: 5'-O-Methyl-2'-trifluoroacetamido-2'-deoxyuridine

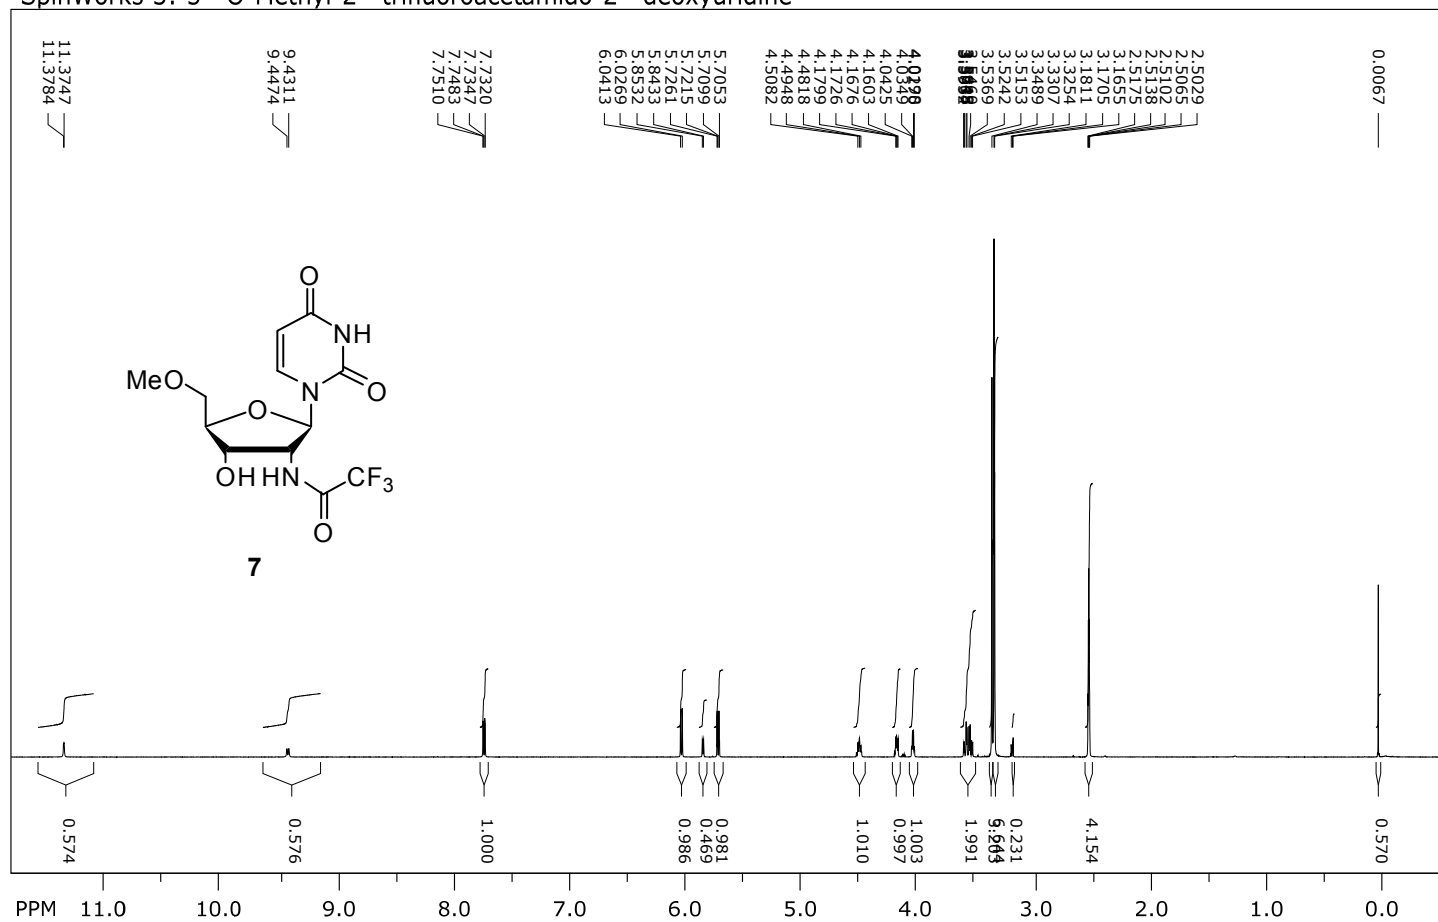

file: ...Maartin spektrit(trifluoro1)\1\fid expt: <zg30>  
 transmitter freq.: 500.133089 MHz  
 time domain size: 65536 points  
 width: 10330.58 Hz = 20.6557 ppm = 0.157632 Hz/pt  
 number of scans: 16

freq. of 0 ppm: 500.130000 MHz  
 processed size: 32768 complex points  
 LB: 0.000 GF: 0.0000  
 Hz/cm: 248.183 ppm/cm: 0.49623

SpinWorks 3: 5'-O-Methyl-2'-trifluoroacetamido-2'-deoxyuridine

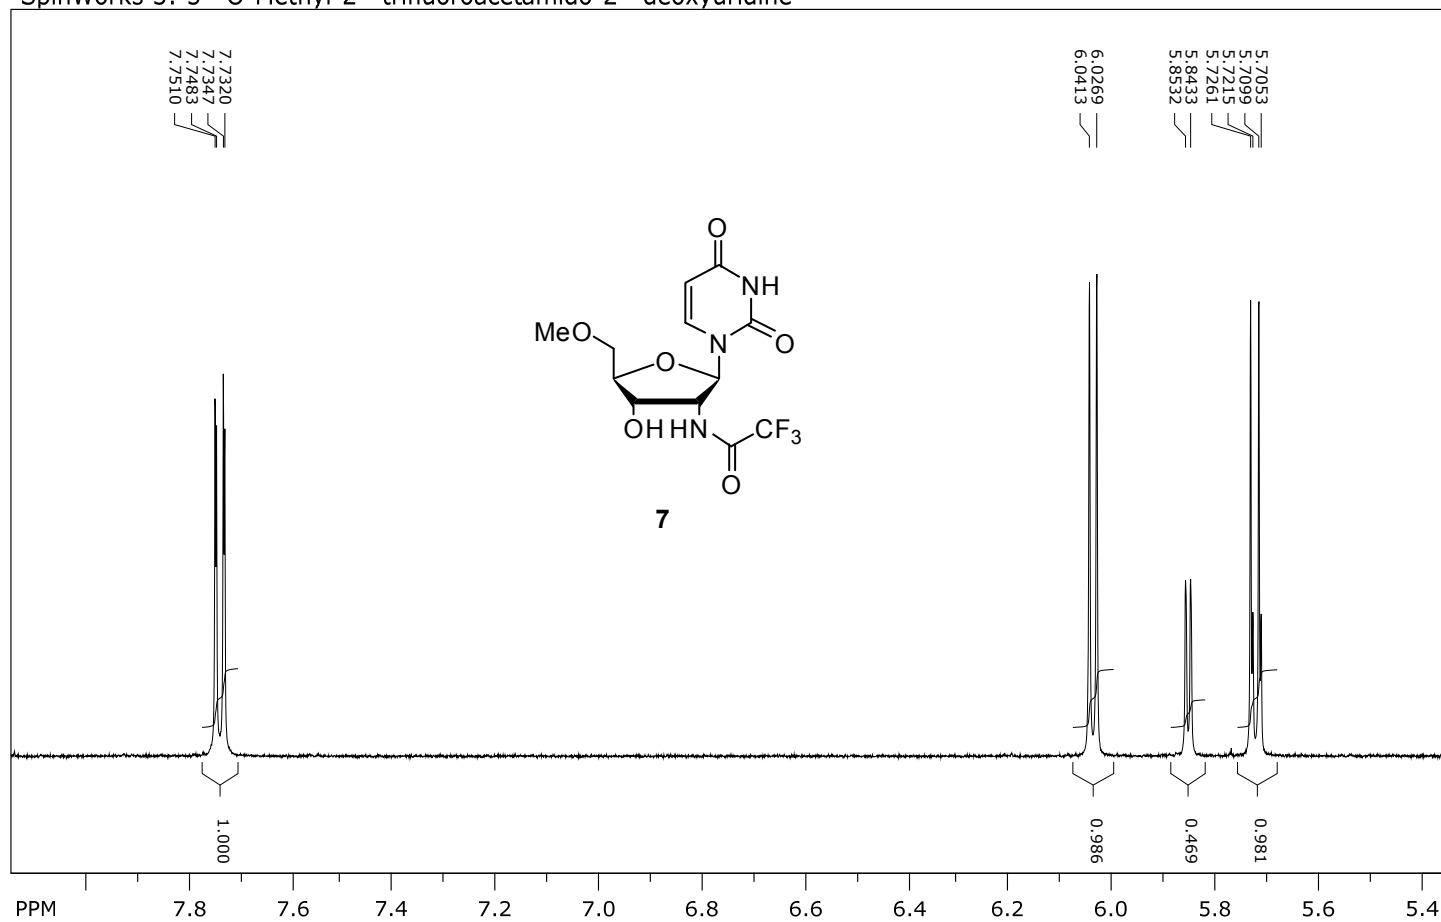

file: ...Maartin spektrit(trifluoro1)\1\fid expt: <zg30>  
transmitter freq.: 500.133089 MHz  
time domain size: 65536 points  
width: 10330.58 Hz = 20.6557 ppm = 0.157632 Hz/pt  
number of scans: 16

freq. of 0 ppm: 500.130000 MHz  
processed size: 32768 complex points  
LB: 0.000 GF: 0.0000  
Hz/cm: 56.108 ppm/cm: 0.11219

SpinWorks 3: 5'-O-Methyl-2'-trifluoroacetamido-2'-deoxyuridine

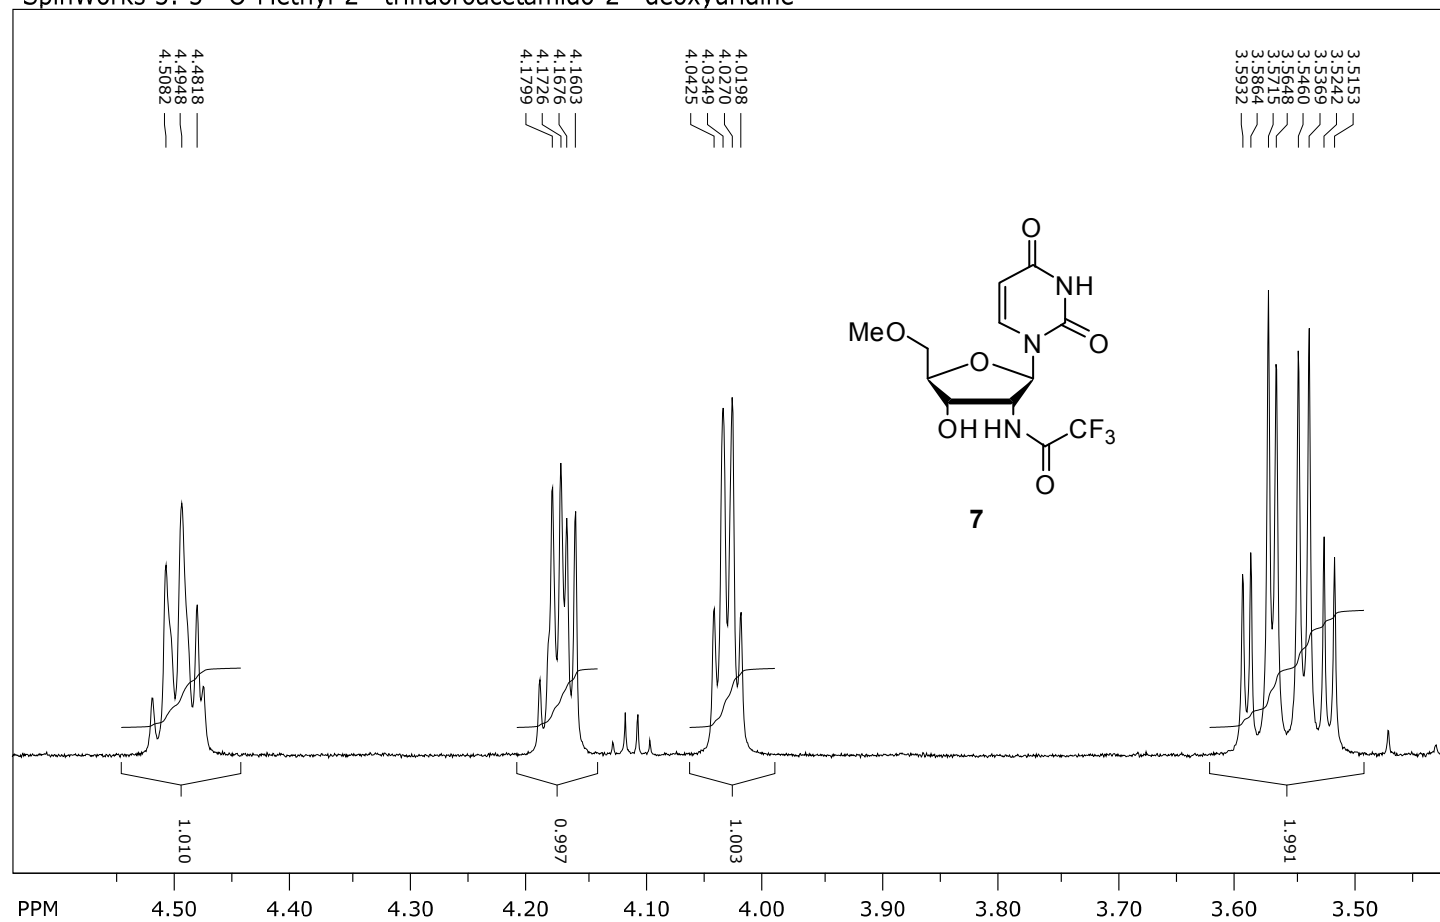

file: ...Maaritin spektrit(trifluoro1)\1\fid expt: <zg30>  
transmitter freq.: 500.133089 MHz  
time domain size: 65536 points  
width: 10330.58 Hz = 20.6557 ppm = 0.157632 Hz/pt  
number of scans: 16

freq. of 0 ppm: 500.130000 MHz  
processed size: 32768 complex points  
LB: 0.000 GF: 0.0000  
Hz/cm: 24.378 ppm/cm: 0.04874



SpinWorks 3: 5'-O-Methyl-2'-trifluoroacetamido-2'-deoxyuridine

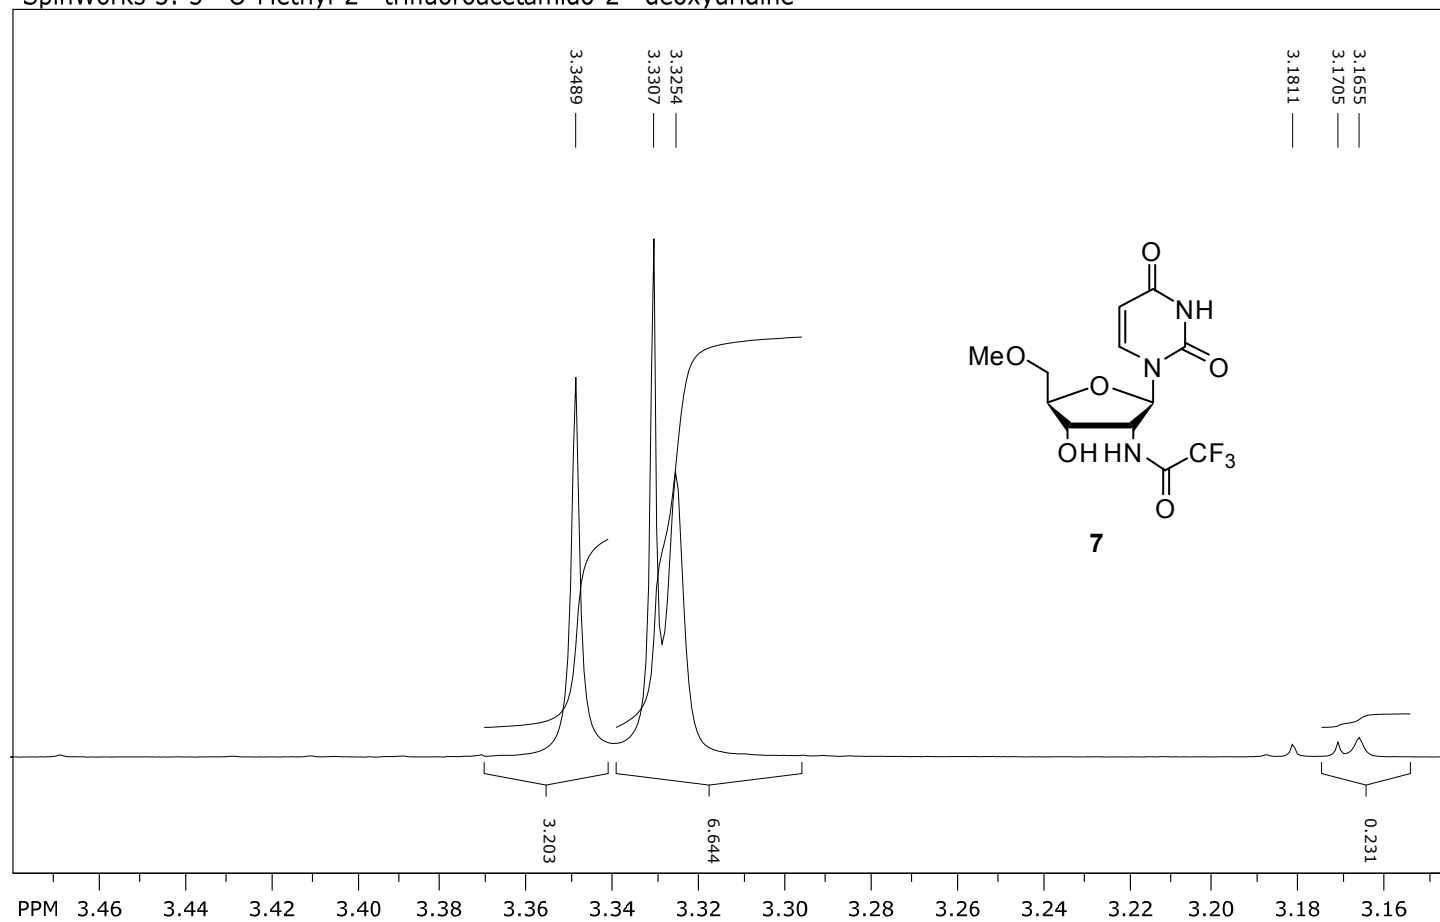

file: ...Maartin spektrit(trifluoro1)\1\fid expt: <zg30>  
transmitter freq.: 500.133089 MHz  
time domain size: 65536 points  
width: 10330.58 Hz = 20.6557 ppm = 0.157632 Hz/pt  
number of scans: 16

freq. of 0 ppm: 500.130000 MHz  
processed size: 32768 complex points  
LB: 0.000 GF: 0.0000  
Hz/cm: 6.717 ppm/cm: 0.01343

SpinWorks 3: 5'-O-Methyl-2'-trifluoroacetamido-2'-deoxyuridine

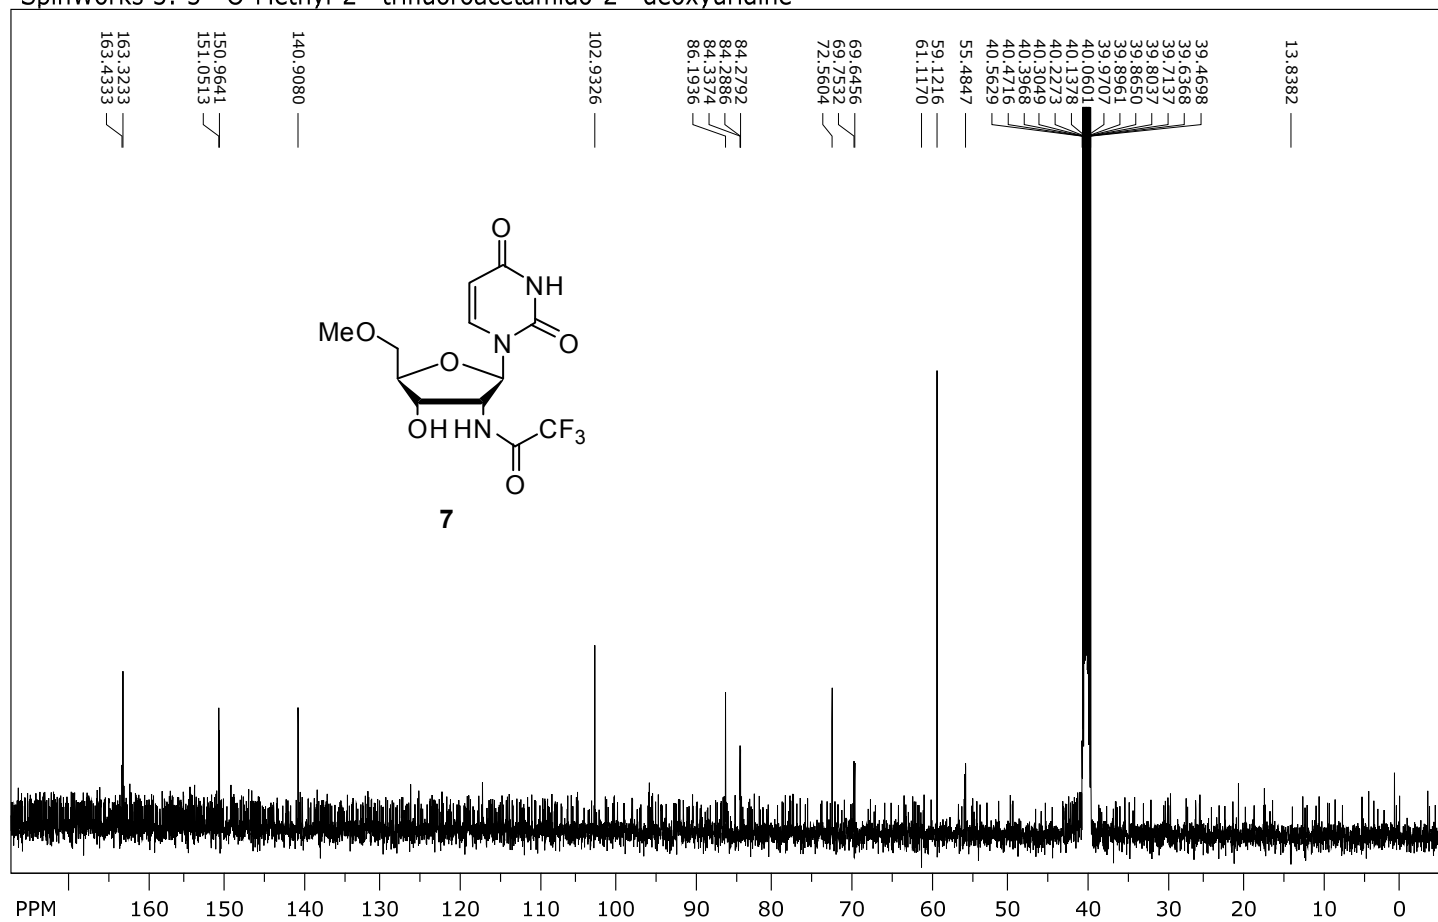

file: ...aaritin spektrit\trifluoro1\13\fid exp: <zgpg30>  
transmitter freq.: 125.770364 MHz  
time domain size: 65536 points  
width: 30030.03 Hz = 238.7687 ppm = 0.458222 Hz/pt  
number of scans: 1196

freq. of 0 ppm: 125.757789 MHz  
processed size: 32768 complex points  
LB: 0.000 GF: 0.0000  
Hz/cm: 923.305 ppm/cm: 7.34119

**Fig. S3** HPLC chromatogram of **7** [Hypersil-Keystone Aquasil C18 column (4 × 150 mm, 5 μm); flow rate = 1 mL min<sup>-1</sup>; 60 mM acetate buffer (pH = 4.3) and a linear gradient of 3→50% MeCN during 60 min, then 50% MeCN for 20 min].

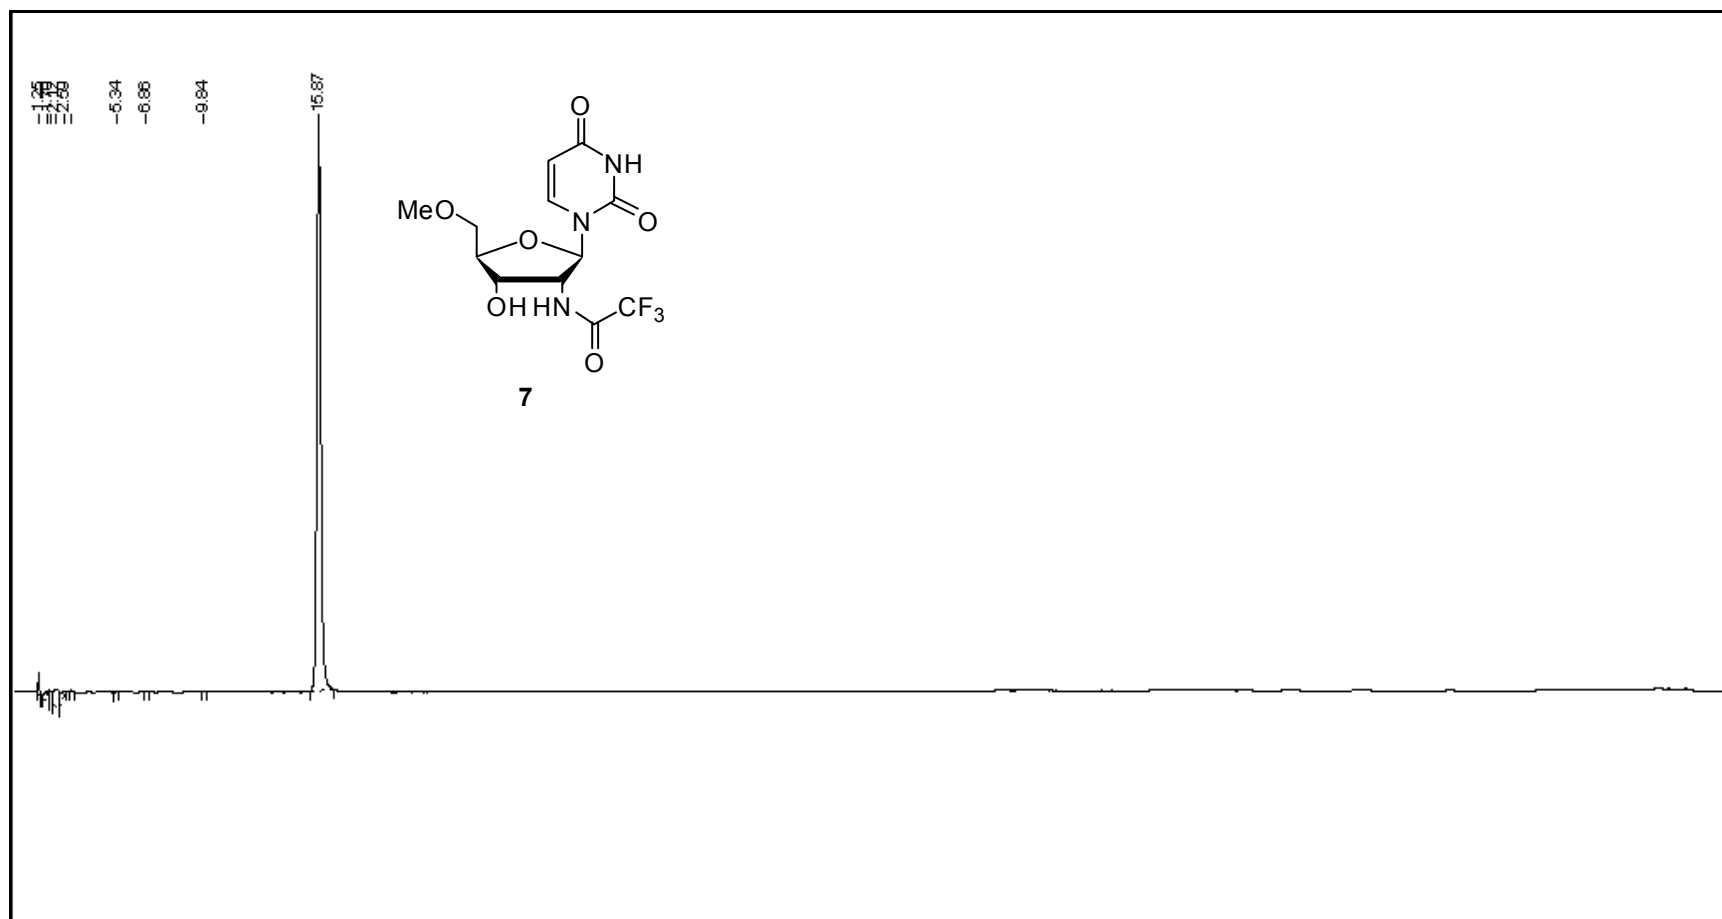

Fig. S4 UV spectrum of 7.

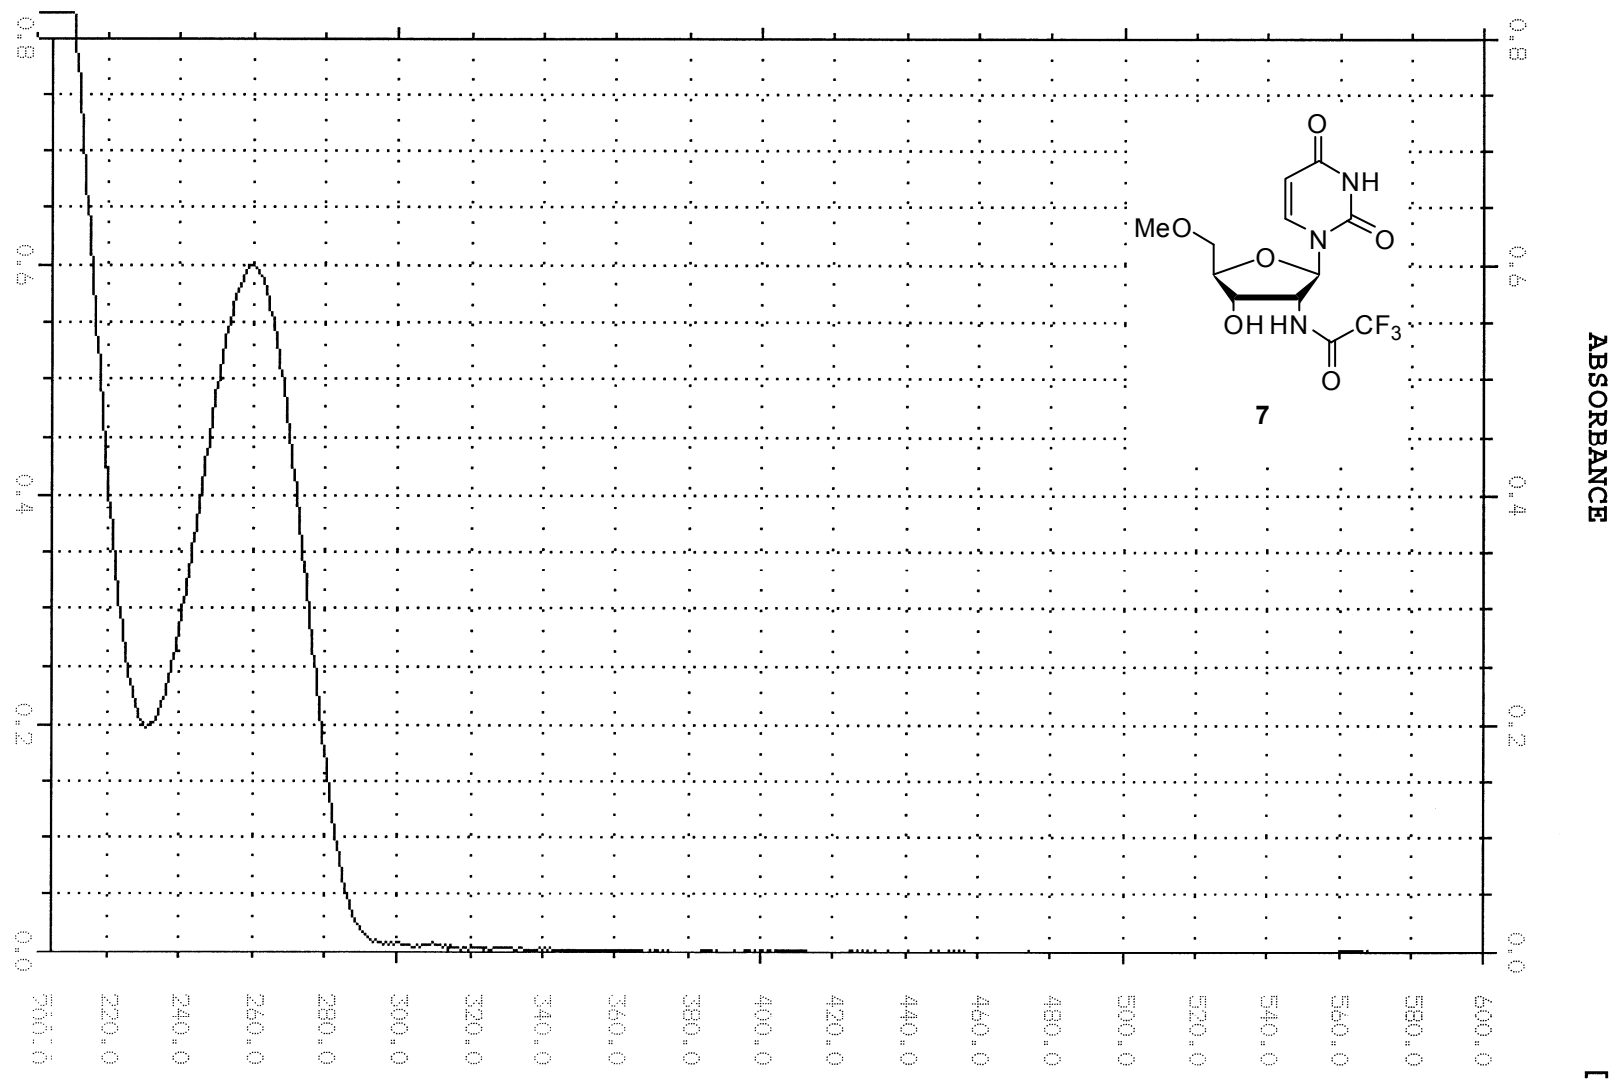



SpinWorks 3: N<sup>6</sup>-Benzoyl-2',3'-O-methyleneadenosin-5'-yl 5'-O-methyl-3'-O-(4,4'-dimethoxytrityl)uridin-2'-yl 5'-O-methyl-2'-trifluoroacetamido-2'-deoxyuridin-3'-yl phosphate

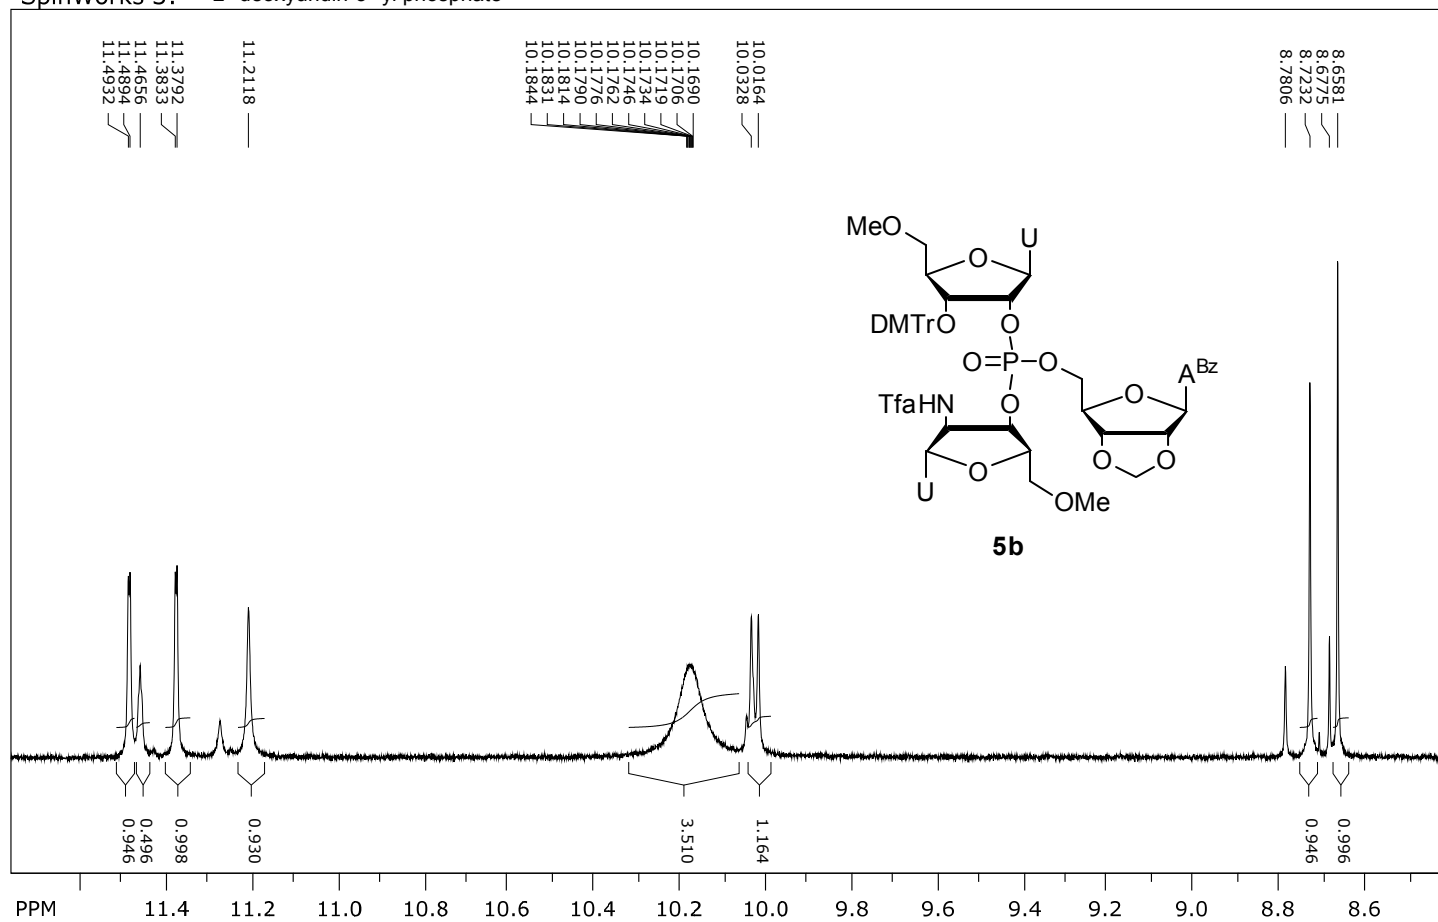

file: ...trit\fosfaatti,1keskimmäinen\1\fid expt: <zg30>  
transmitter freq.: 500.133089 MHz  
time domain size: 65536 points  
width: 10330.58 Hz = 20.6557 ppm = 0.157632 Hz/pt  
number of scans: 16

freq. of 0 ppm: 500.130000 MHz  
processed size: 32768 complex points  
LB: 0.000 GF: 0.0000  
Hz/cm: 67.262 ppm/cm: 0.13449

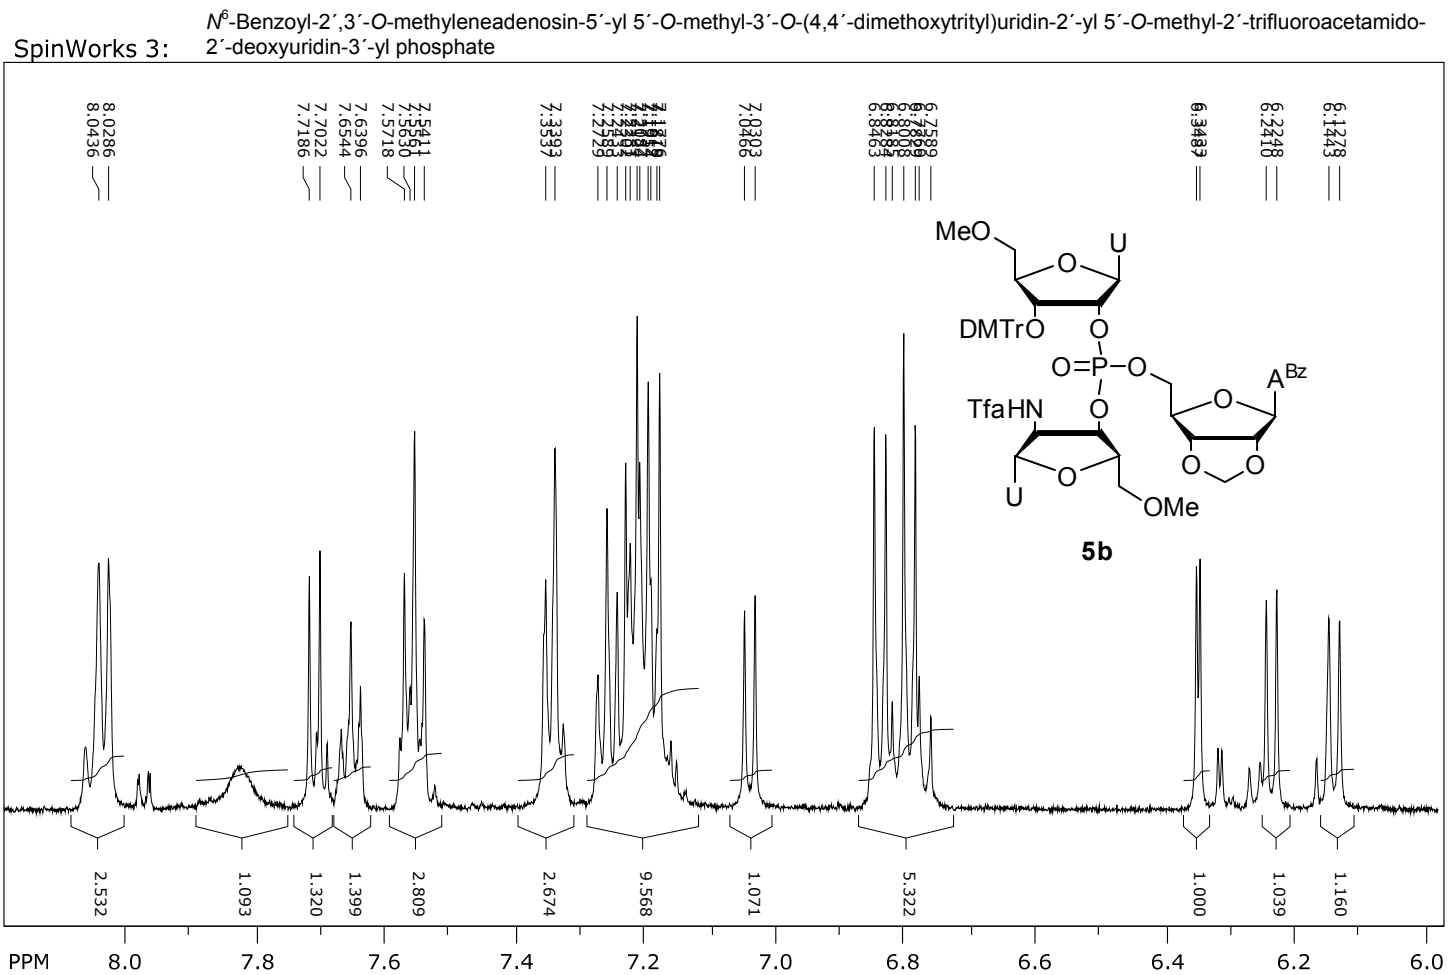

file: ...trit(fosfaatti,1keskimmäinen\1)fid expt: <zg30>  
 transmitter freq.: 500.133089 MHz  
 time domain size: 65536 points  
 width: 10330.58 Hz = 20.6557 ppm = 0.157632 Hz/pt  
 number of scans: 16

freq. of 0 ppm: 500.130000 MHz  
 processed size: 32768 complex points  
 LB: 0.000 GF: 0.0000  
 Hz/cm: 44.301 ppm/cm: 0.08858

SpinWorks 3: N<sup>6</sup>-Benzoyl-2',3'-O-methyleneadenosin-5'-yl 5'-O-methyl-3'-O-(4,4'-dimethoxytrityl)uridin-2'-yl 5'-O-methyl-2'-trifluoroacetamido-2'-deoxyuridin-3'-yl phosphate

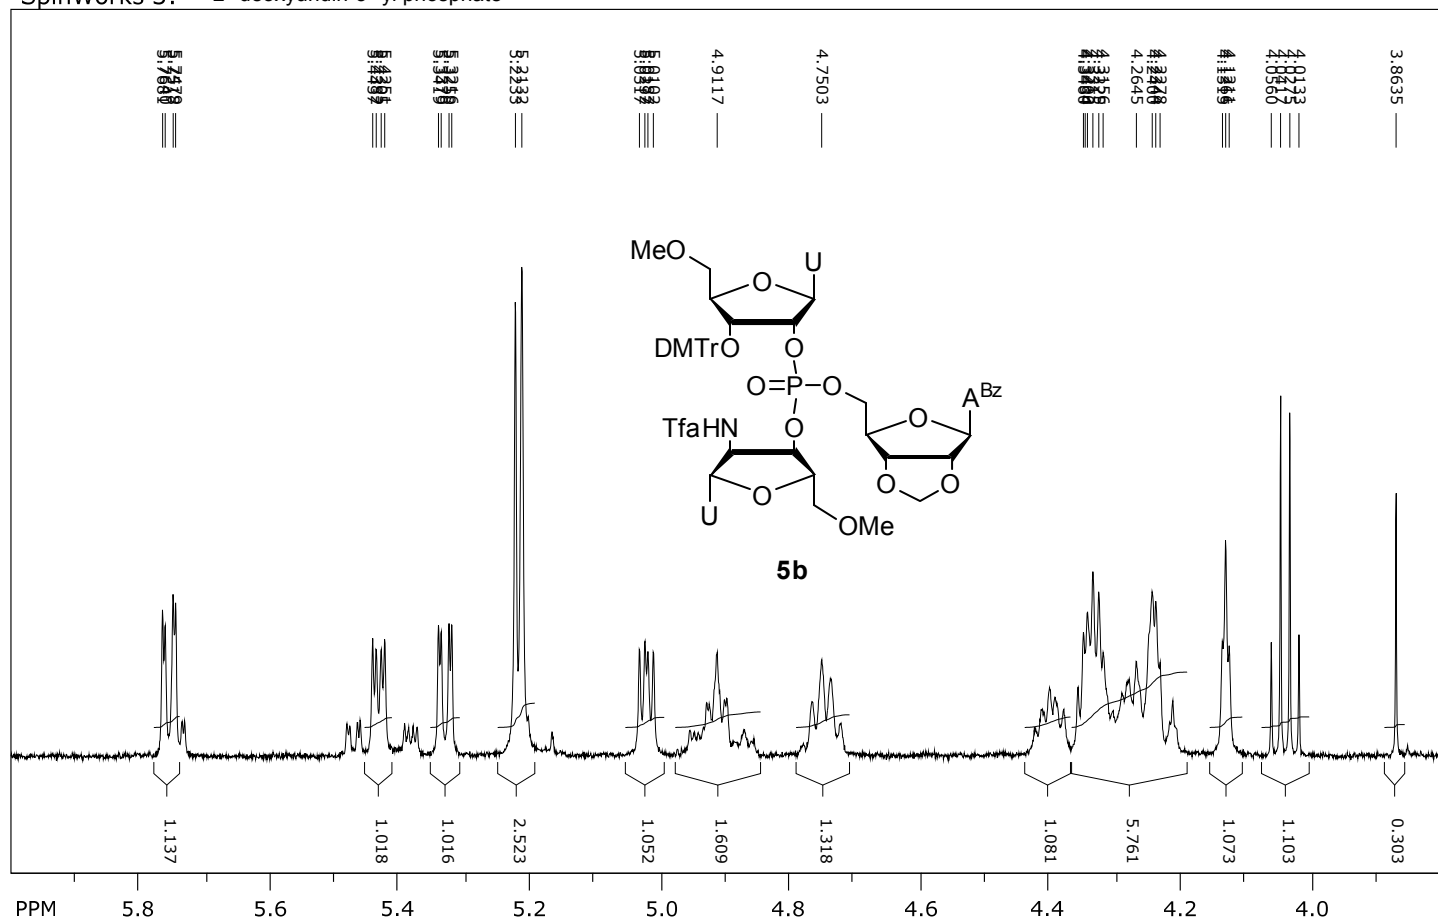

file: ...trit\fosfaatti,1keskimmäinen\1\fid exp: <zg30>  
transmitter freq.: 500.133089 MHz  
time domain size: 65536 points  
width: 10330.58 Hz = 20.6557 ppm = 0.157632 Hz/pt  
number of scans: 16

freq. of 0 ppm: 500.130000 MHz  
processed size: 32768 complex points  
LB: 0.000 GF: 0.0000  
Hz/cm: 44.301 ppm/cm: 0.08858



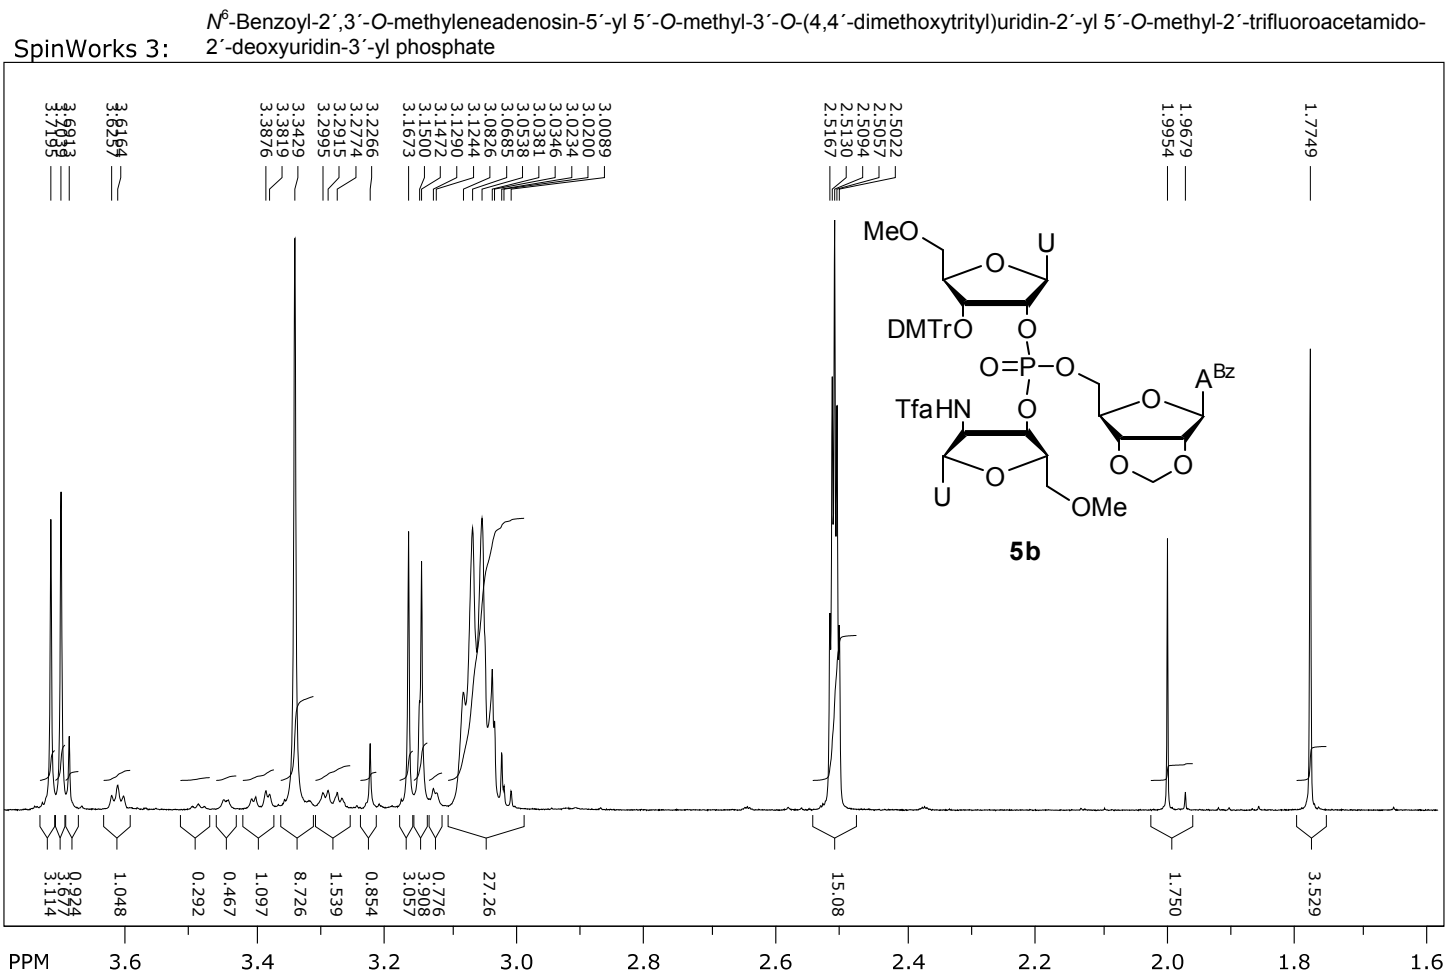

file: ...trit(fosfaatti,1keskimmäinen)\1\fid expt: <zg30>  
 transmitter freq.: 500.133089 MHz  
 time domain size: 65536 points  
 width: 10330.58 Hz = 20.6557 ppm = 0.157632 Hz/pt  
 number of scans: 16

freq. of 0 ppm: 500.130000 MHz  
 processed size: 32768 complex points  
 LB: 0.000 GF: 0.0000  
 Hz/cm: 44.301 ppm/cm: 0.08858

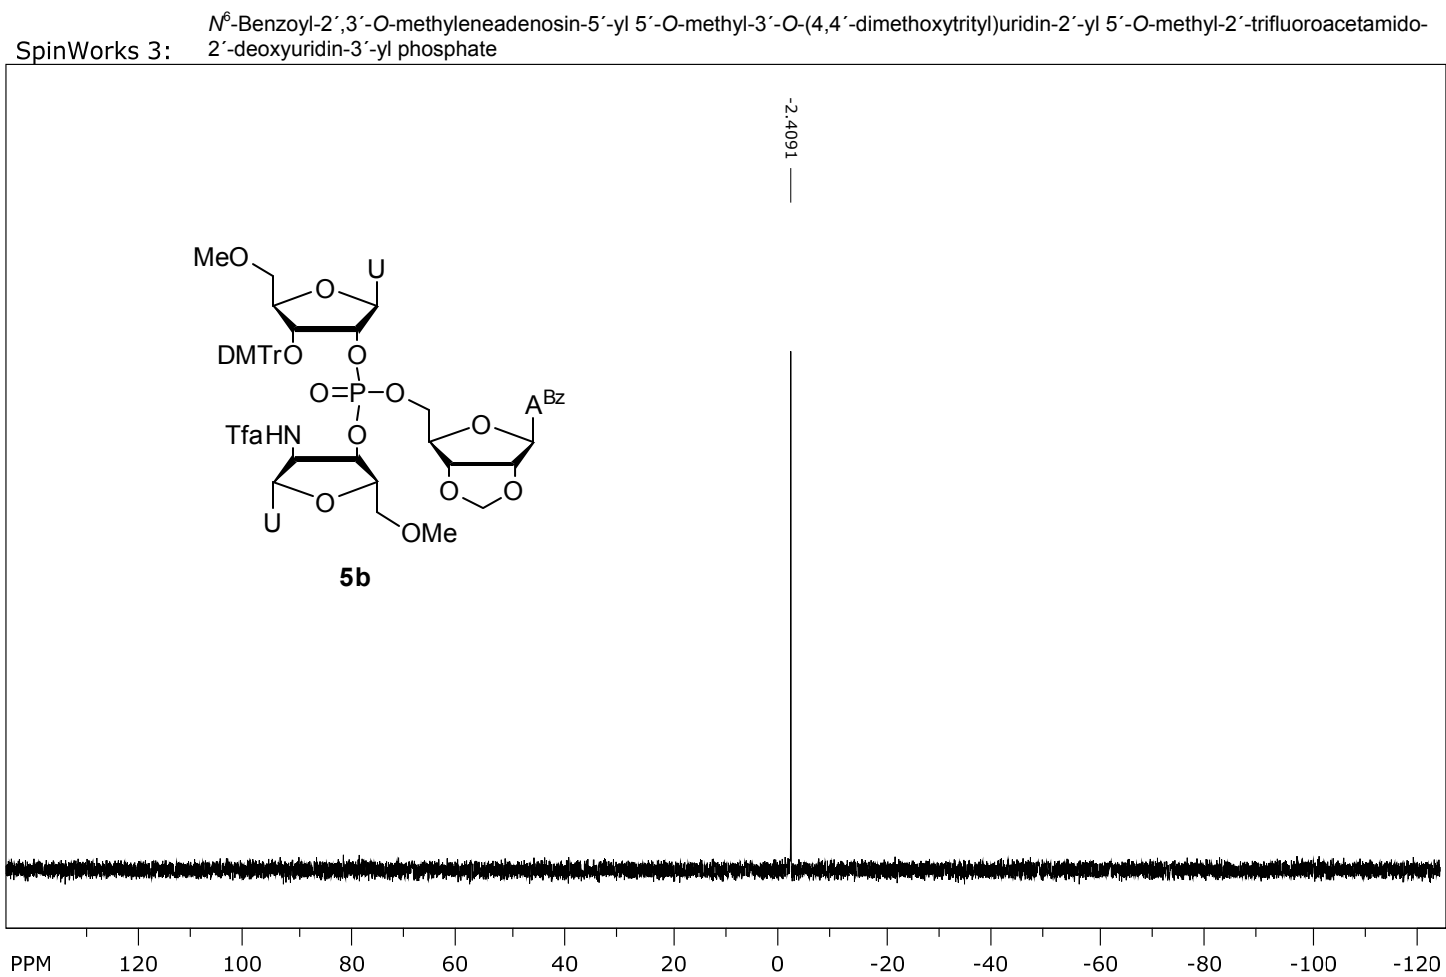

file: ...rit\fosfaatti,1keskimmäinen\31\fid exp: <zpgg30>  
transmitter freq.: 202.446187 MHz  
time domain size: 65536 points  
width: 80645.16 Hz = 398.3536 ppm = 1.230548 Hz/pt  
number of scans: 154

freq. of 0 ppm: 202.456310 MHz  
processed size: 32768 complex points  
LB: 0.000 GF: 0.0000  
Hz/cm: 2185.381 ppm/cm: 10.79487

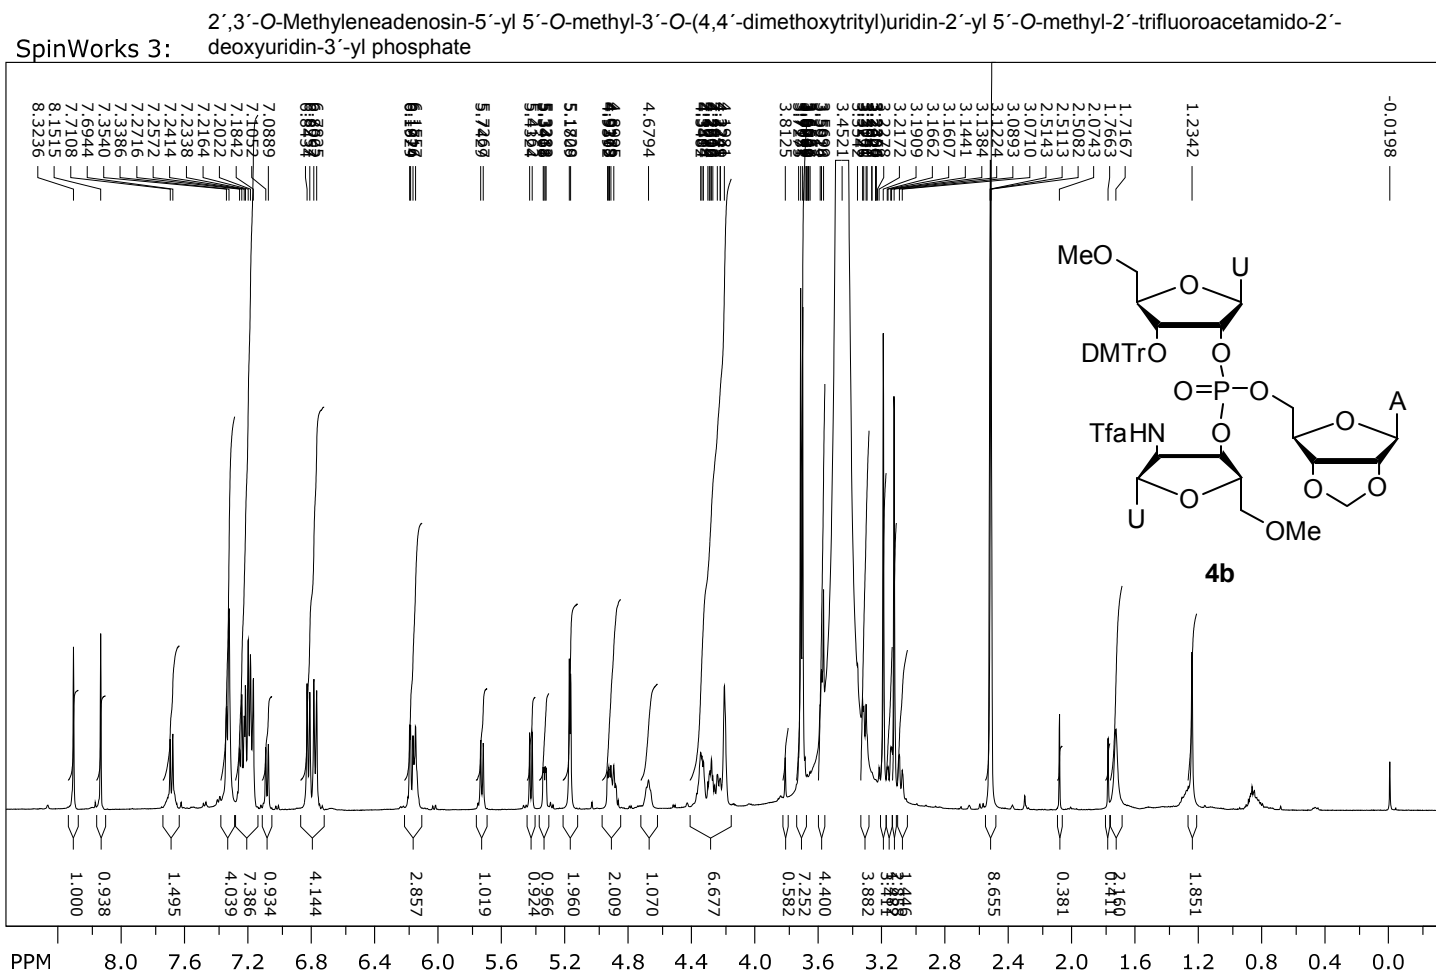

file: ...sfaatti, suojat poistettu(2)\1\fid exp: <zg30>  
 transmitter freq.: 500.133089 MHz  
 time domain size: 65536 points  
 width: 10330.58 Hz = 20.6557 ppm = 0.157632 Hz/pt  
 number of scans: 150

freq. of 0 ppm: 500.130000 MHz  
 processed size: 32768 complex points  
 LB: 0.000 GF: 0.0000  
 Hz/cm: 181.856 ppm/cm: 0.36361

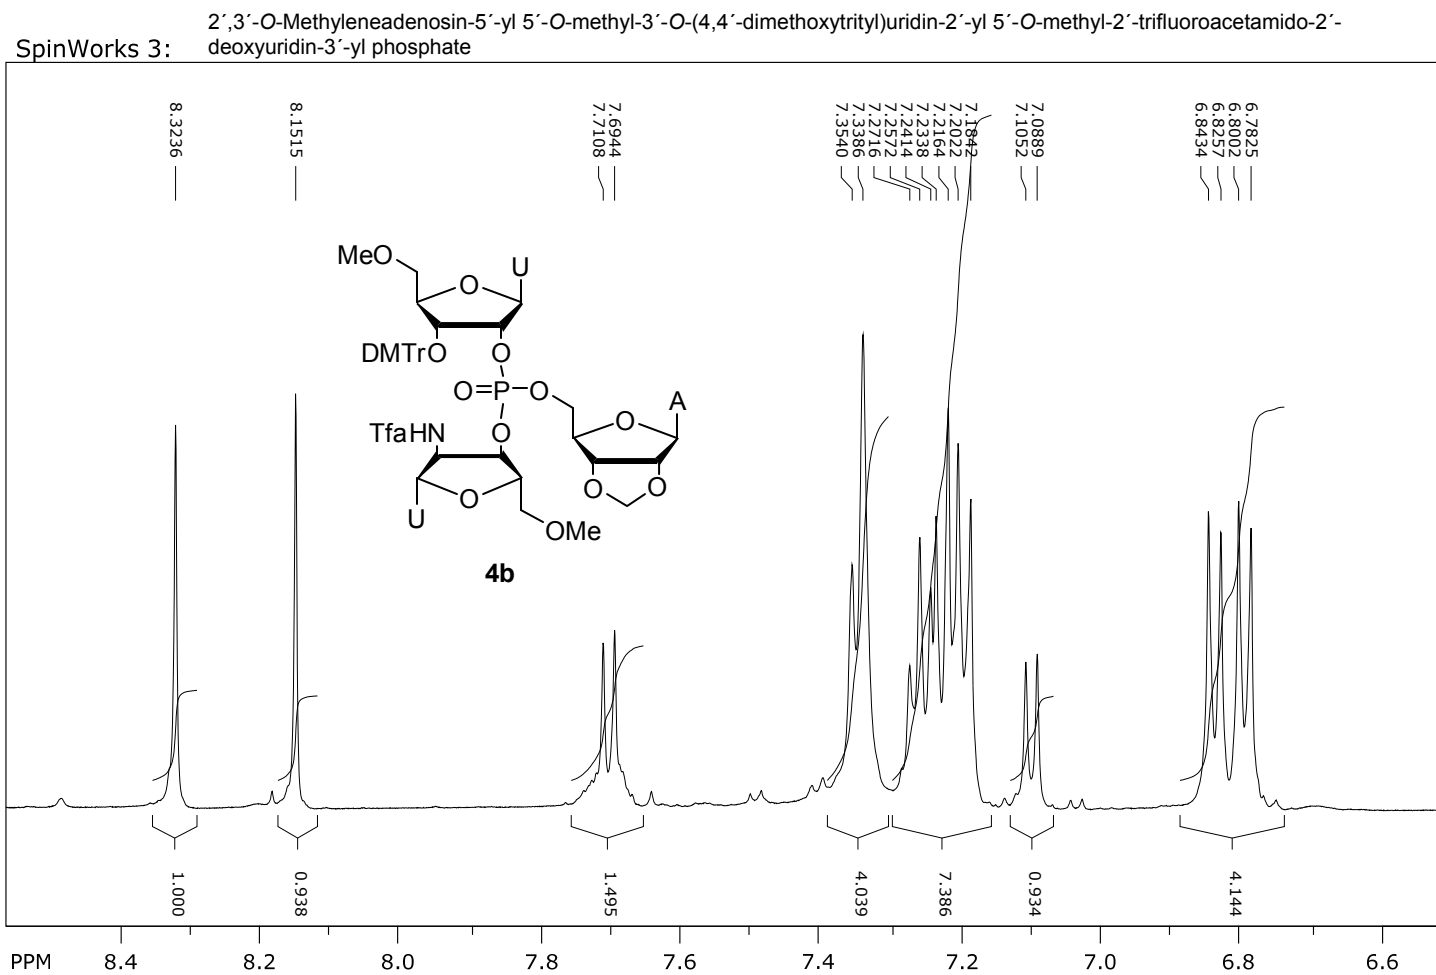

file: ...sfaatti, suojat poistettu(2)\1\fid expt: <zg30>  
transmitter freq.: 500.133089 MHz  
time domain size: 65536 points  
width: 10330.58 Hz = 20.6557 ppm = 0.157632 Hz/pt  
number of scans: 150

freq. of 0 ppm: 500.130000 MHz  
processed size: 32768 complex points  
LB: 0.000 GF: 0.0000  
Hz/cm: 41.113 ppm/cm: 0.08220

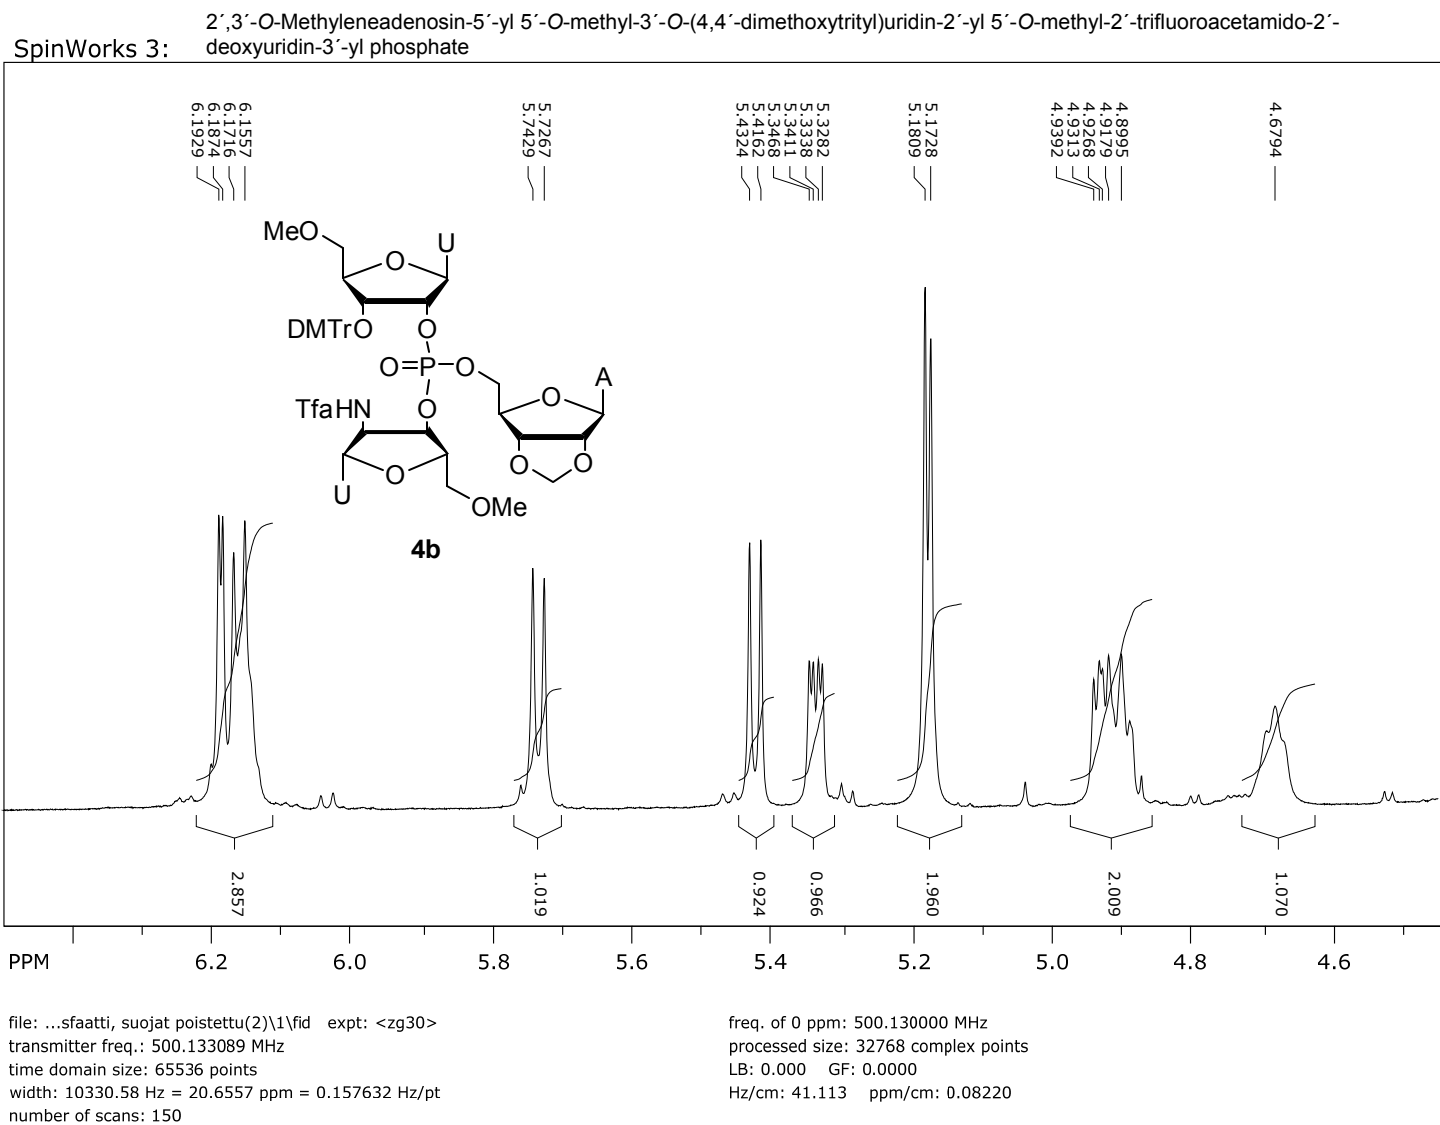

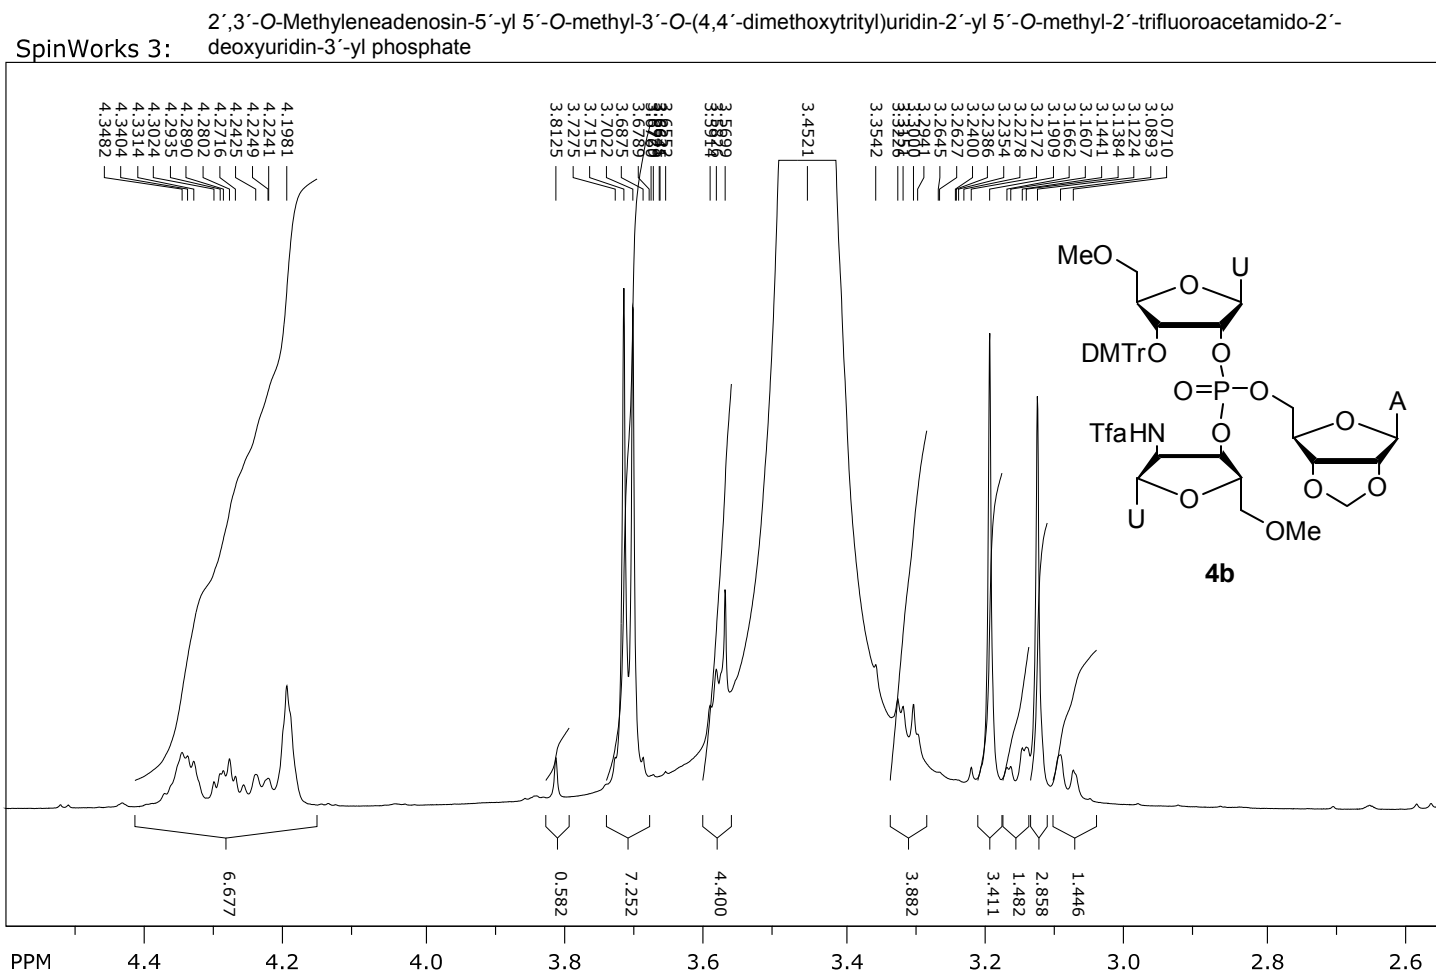

file: ...sfaatti, suojat poistettu(2)\1\fid expt: <zg30>  
 transmitter freq.: 500.133089 MHz  
 time domain size: 65536 points  
 width: 10330.58 Hz = 20.6557 ppm = 0.157632 Hz/pt  
 number of scans: 150

freq. of 0 ppm: 500.130000 MHz  
 processed size: 32768 complex points  
 LB: 0.000 GF: 0.0000  
 Hz/cm: 41.113 ppm/cm: 0.08220

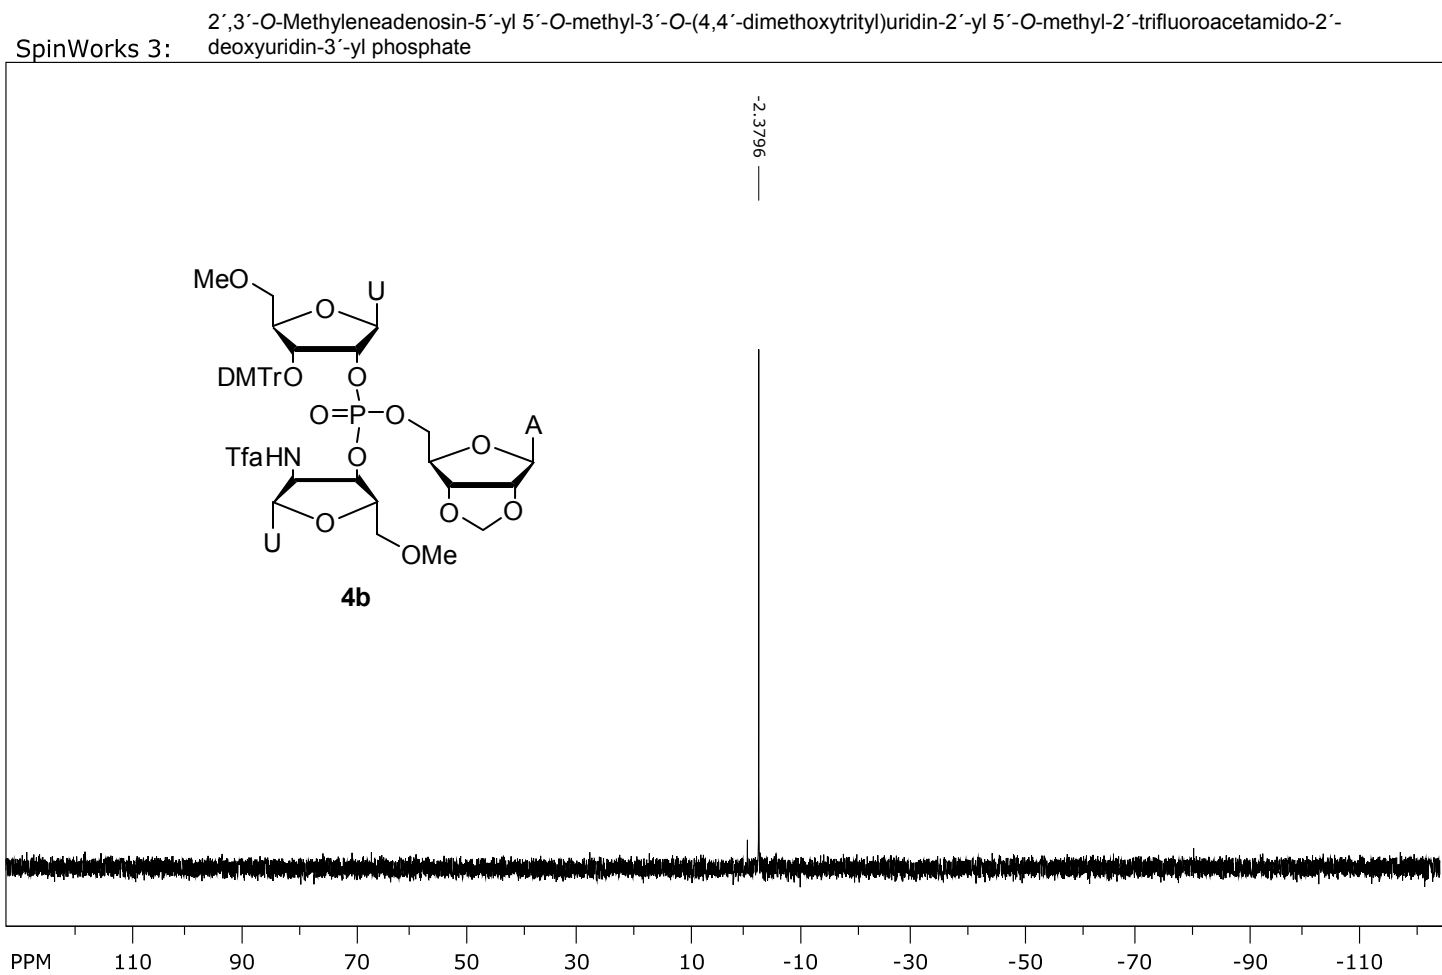

file: ...faatti, suojat poistettu(2)\31\fid exp: <zpgg30>  
transmitter freq.: 202.446187 MHz  
time domain size: 65536 points  
width: 80645.16 Hz = 398.3536 ppm = 1.230548 Hz/pt  
number of scans: 200

freq. of 0 ppm: 202.456310 MHz  
processed size: 32768 complex points  
LB: 0.000 GF: 0.0000  
Hz/cm: 2088.144 ppm/cm: 10.31457

**Fig. S5** HPLC chromatogram of **4b** [Hypersil-Keystone Aquasil C18 column (4 × 150 mm, 5 μm); flow rate = 1 mL min<sup>-1</sup>; 60 mM acetate buffer (pH = 4.3) and a linear gradient of 3→50% MeCN during 60 min, then 50% MeCN for 20 min].

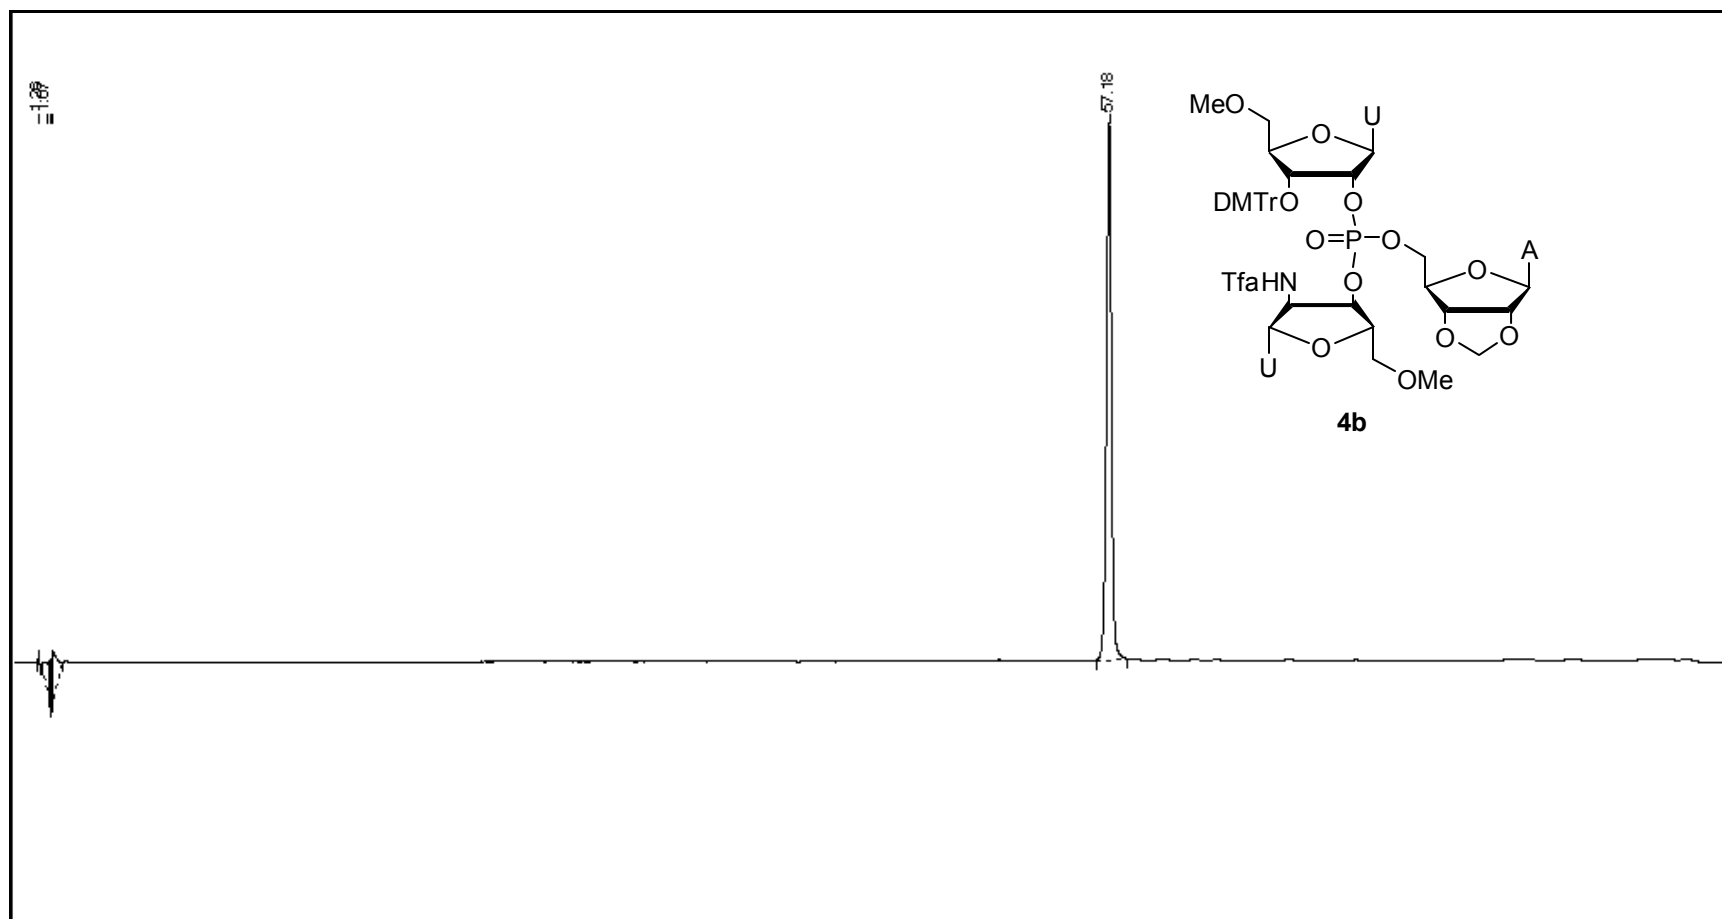



Fig. S6 UV spectrum of 4b.

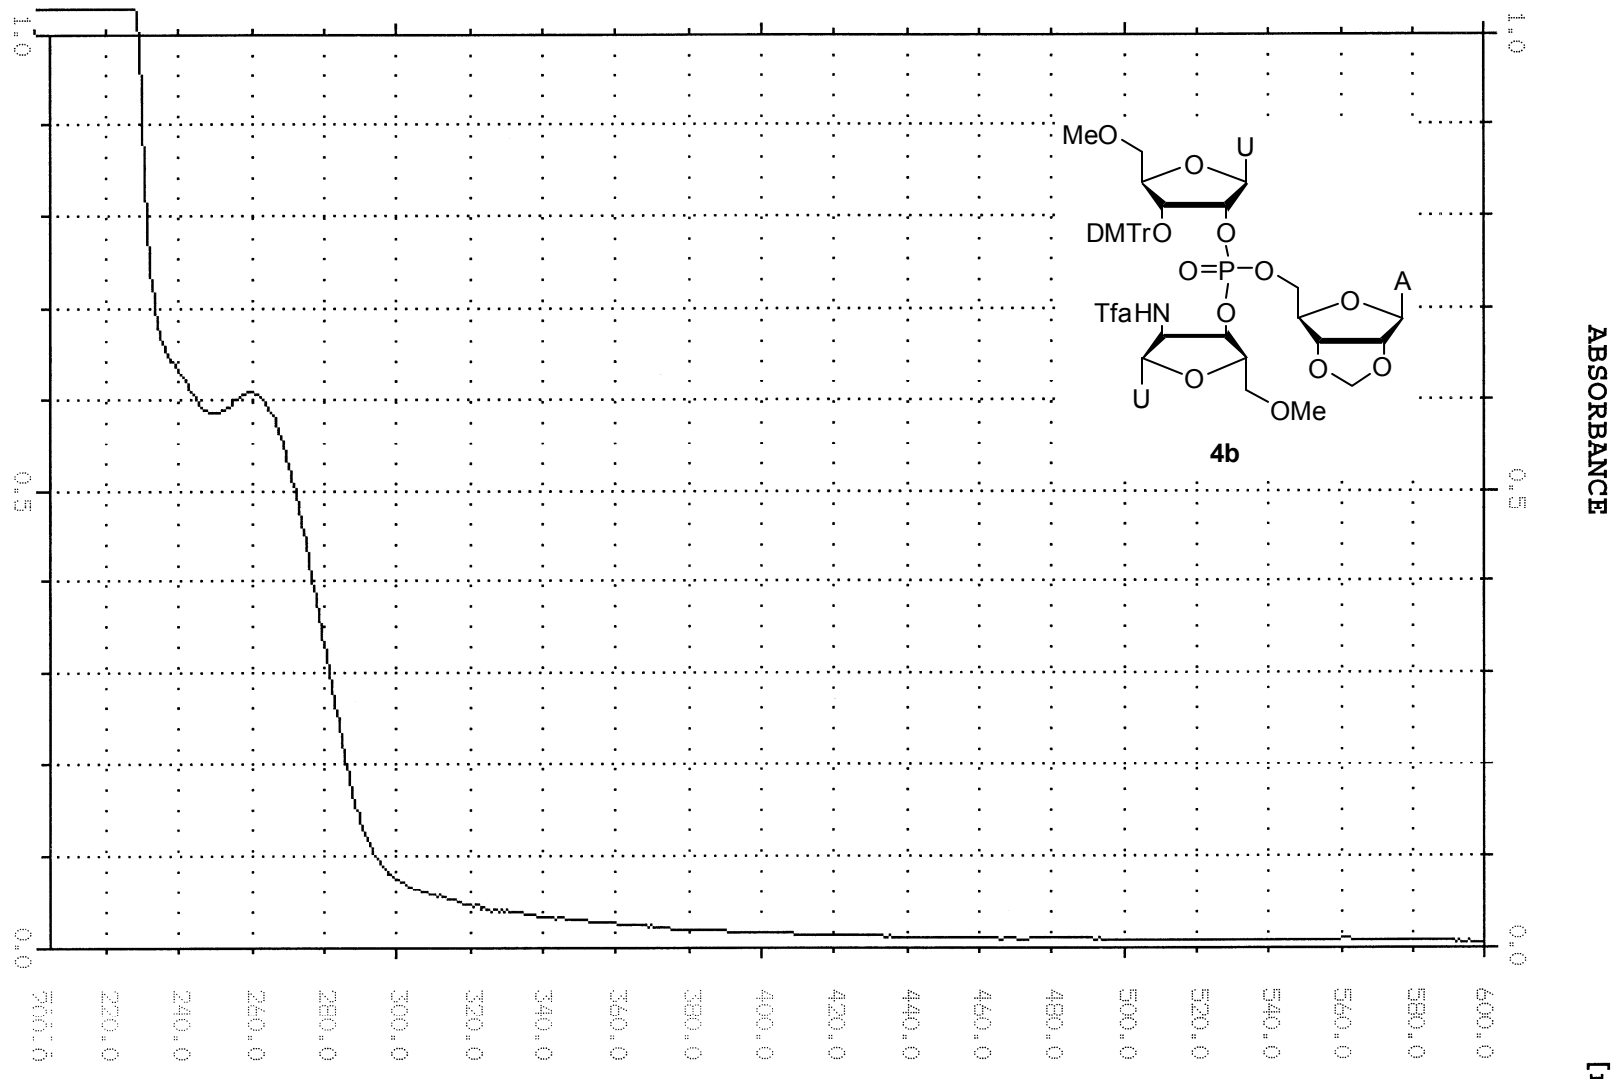

**Table S1** Observed pseudo first-order rate constants and product distributions for the hydrolysis of **1a, b**.

| pH    | [buffer] / mmol L <sup>-1</sup> | $k_{\text{obs}} / 10^{-4} \text{ s}^{-1}$ | $k_{\text{B}} / (k_{\text{A}} + k_{\text{B}})$ |
|-------|---------------------------------|-------------------------------------------|------------------------------------------------|
| 0.02  | -                               | 39 ± 2                                    | 0.6 ± 0.1                                      |
| 0.39  | -                               | 11 ± 3                                    | 0.64 ± 0.07                                    |
| 1.00  | -                               | 5.6 ± 0.3                                 | 0.60 ± 0.06                                    |
| 1.37  | -                               | 2.8 ± 0.1                                 | 0.62 ± 0.03                                    |
| 2.00  | -                               | 3.3 ± 0.5                                 | 0.62 ± 0.06                                    |
| 2.81  | 47.5                            | 4.3 ± 0.4                                 |                                                |
|       | 95.0                            | 5.2 ± 0.1                                 | 0.60 ± 0.02                                    |
|       | 190.0                           | 7.2 ± 0.2                                 |                                                |
| 3.37  | 47.5                            | 6.2 ± 0.1                                 |                                                |
|       | 95.0                            | 8.0 ± 0.2                                 |                                                |
|       | 142.5                           | 9.5 ± 0.3                                 | 0.61 ± 0.04                                    |
|       | 190.0                           | 12.9 ± 0.3                                |                                                |
| 4.30  | 47.5                            | 14.4 ± 0.2                                |                                                |
|       | 95.0                            | 22.4 ± 0.6                                |                                                |
|       | 142.5                           | 36 ± 1                                    | 0.60 ± 0.06                                    |
|       | 190.0                           | 44 ± 3                                    |                                                |
| 4.75  | 47.5                            | 23.7 ± 0.7                                |                                                |
|       | 95.0                            | 36 ± 1                                    |                                                |
|       | 142.5                           | 45 ± 1                                    | 0.65 ± 0.02                                    |
|       | 190.0                           | 59 ± 2                                    |                                                |
| 5.82  | 47.5                            | 58 ± 2                                    | 0.74 ± 0.08                                    |
| 6.27  | 47.5                            | 138 ± 7                                   | 0.94 ± 0.02                                    |
| 6.73  | 47.5                            | 270 ± 10                                  | 0.98 ± 0.03                                    |
| 11.73 | -                               | -                                         | 1.00                                           |

**Fig. S7** HPLC chromatogram of a reaction solution of the hydrolysis of **1a** and **1b** [Hypersil-Keystone Aquasil C18 column (4 × 150 mm, 5 μm); flow rate = 1 mL min<sup>-1</sup>; 60 mM formate buffer (pH = 3.0) and a linear gradient of 3→30% MeCN during 40 min].

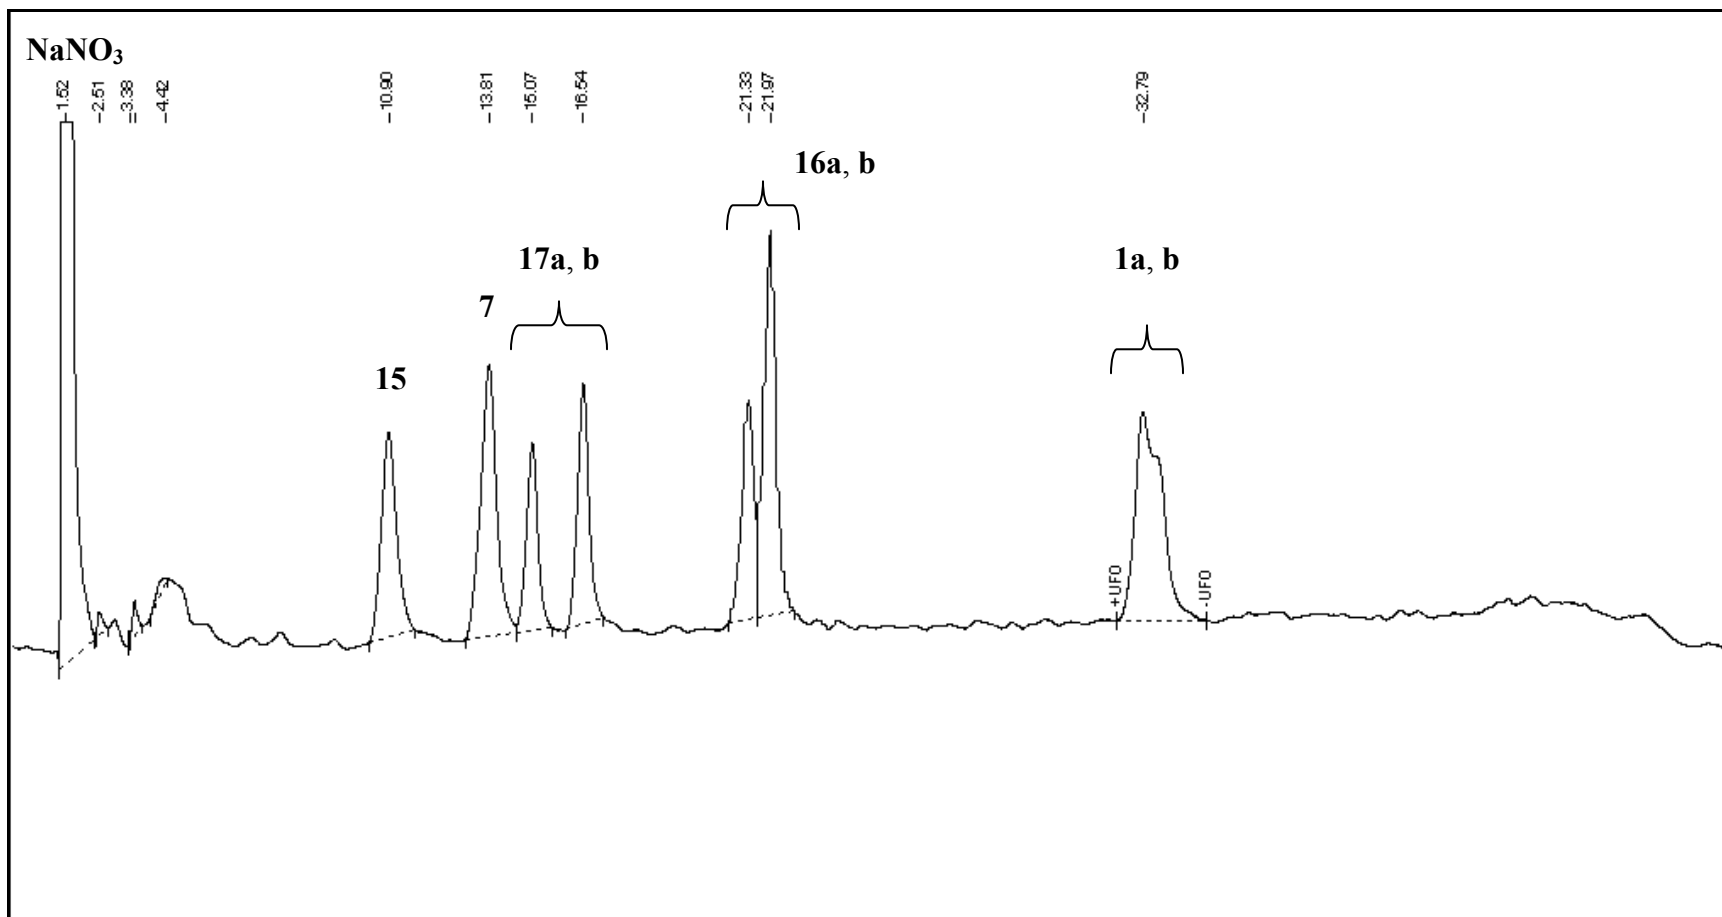

Supplement: b912042d.pdf [file b912042d.pdf]
